# Supplementary material for: Investigation of thermal control in phase-changing ABO3 perovskites via first-principles predictions: general mechanism of solar absorptivity
Source: Royal Society of Chemistry journal article supplement (doi:10.1039/d3cp01493b), 2023-01-01

(a)

Cubic

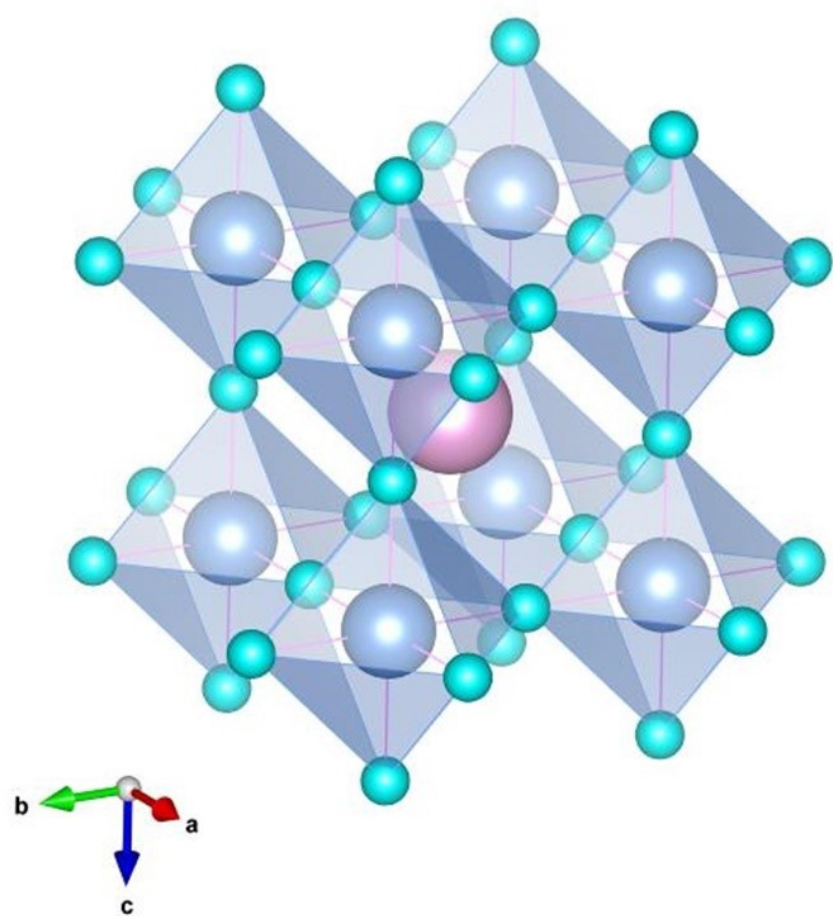

(b)

Hexagonal

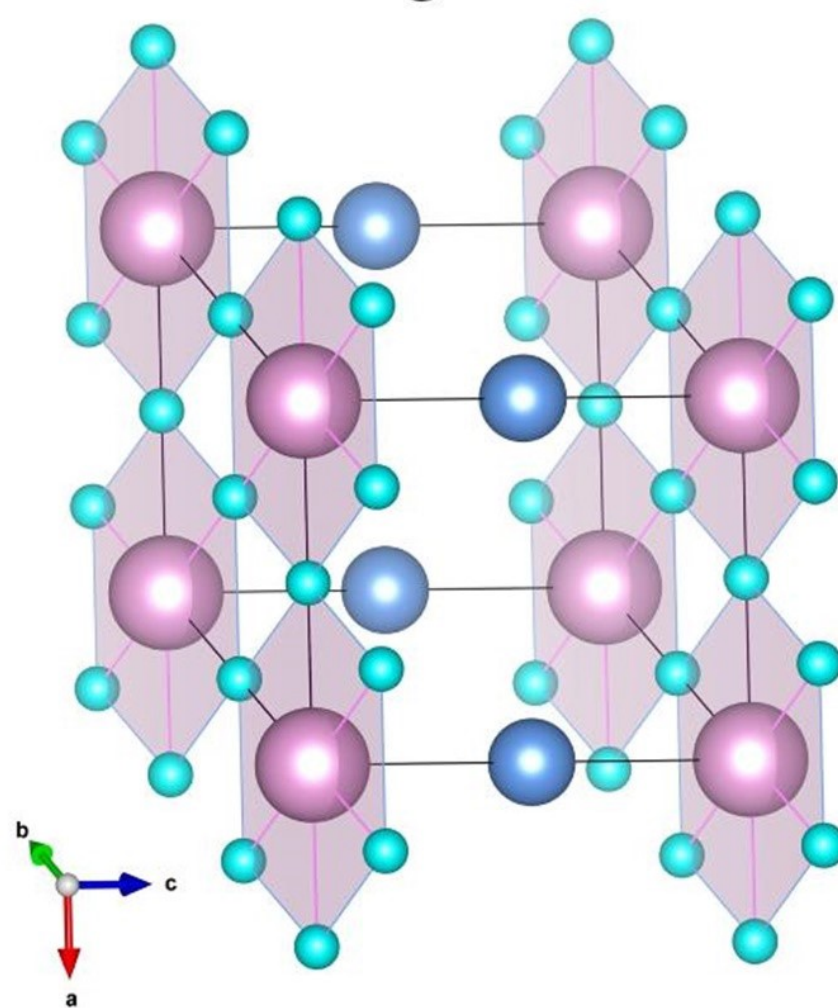

(c)

Tetragonal

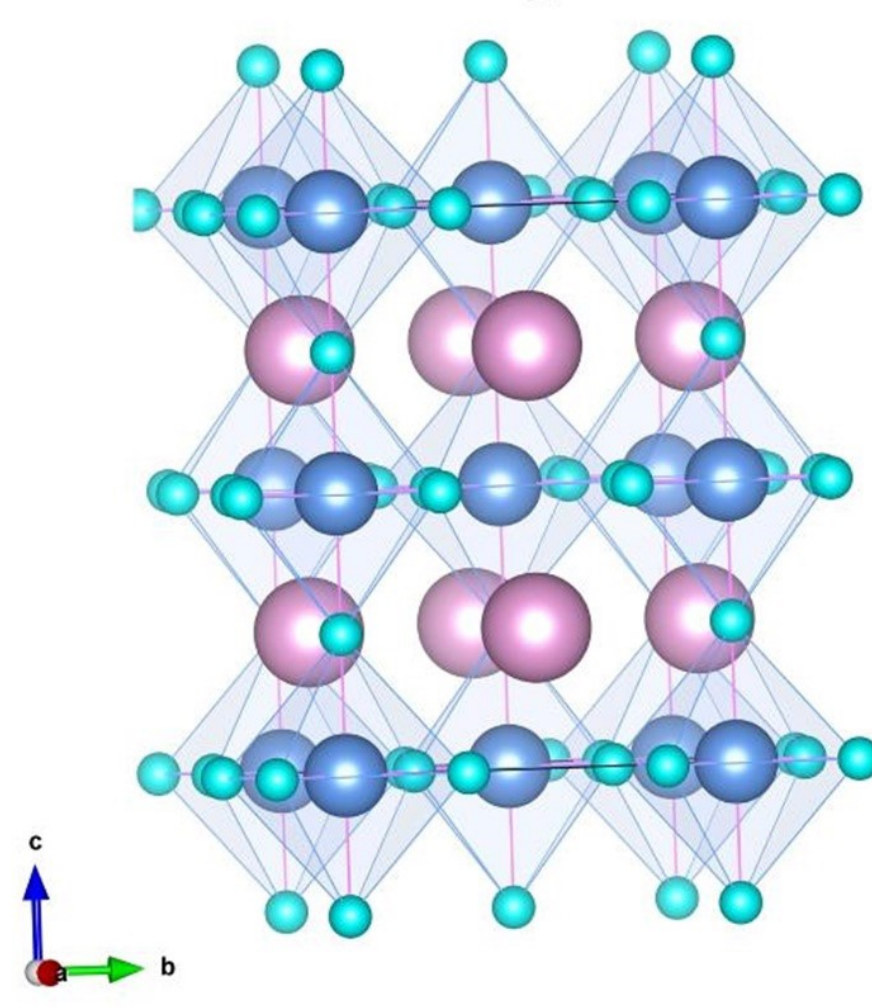

(d)

Rhombohedral

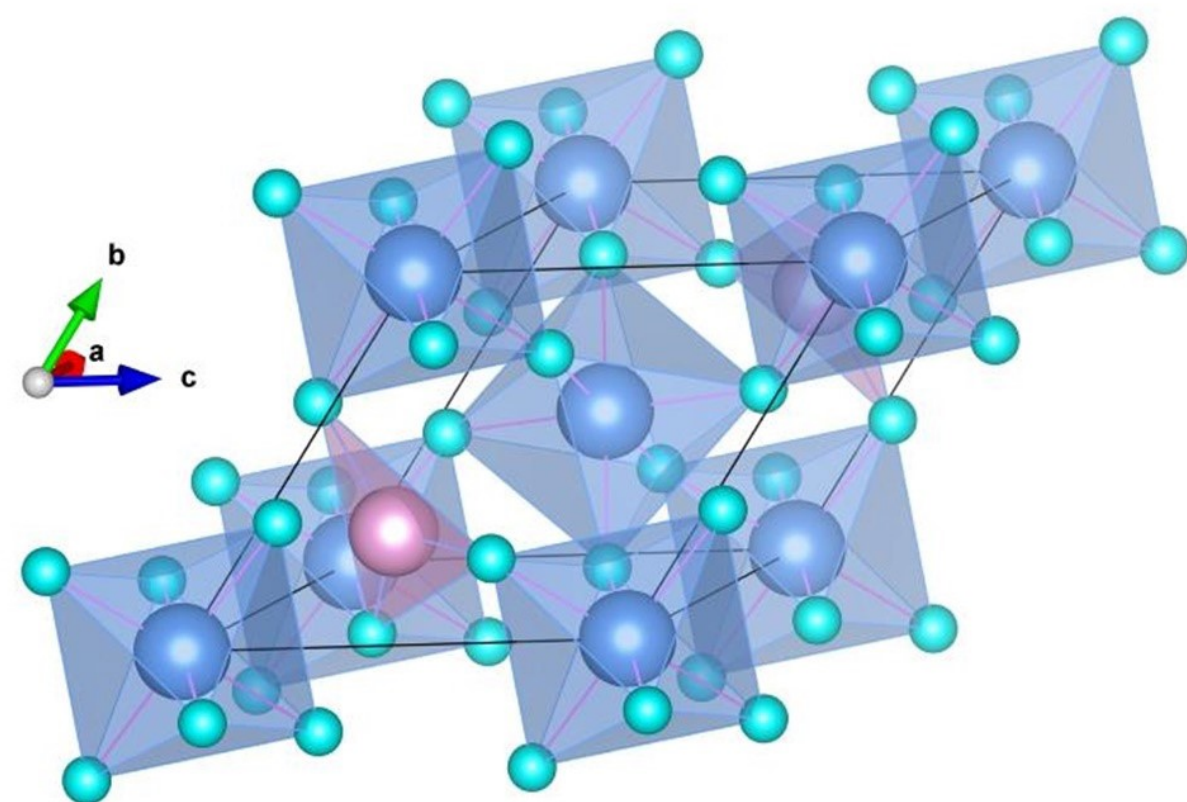

(e)

Trigonal

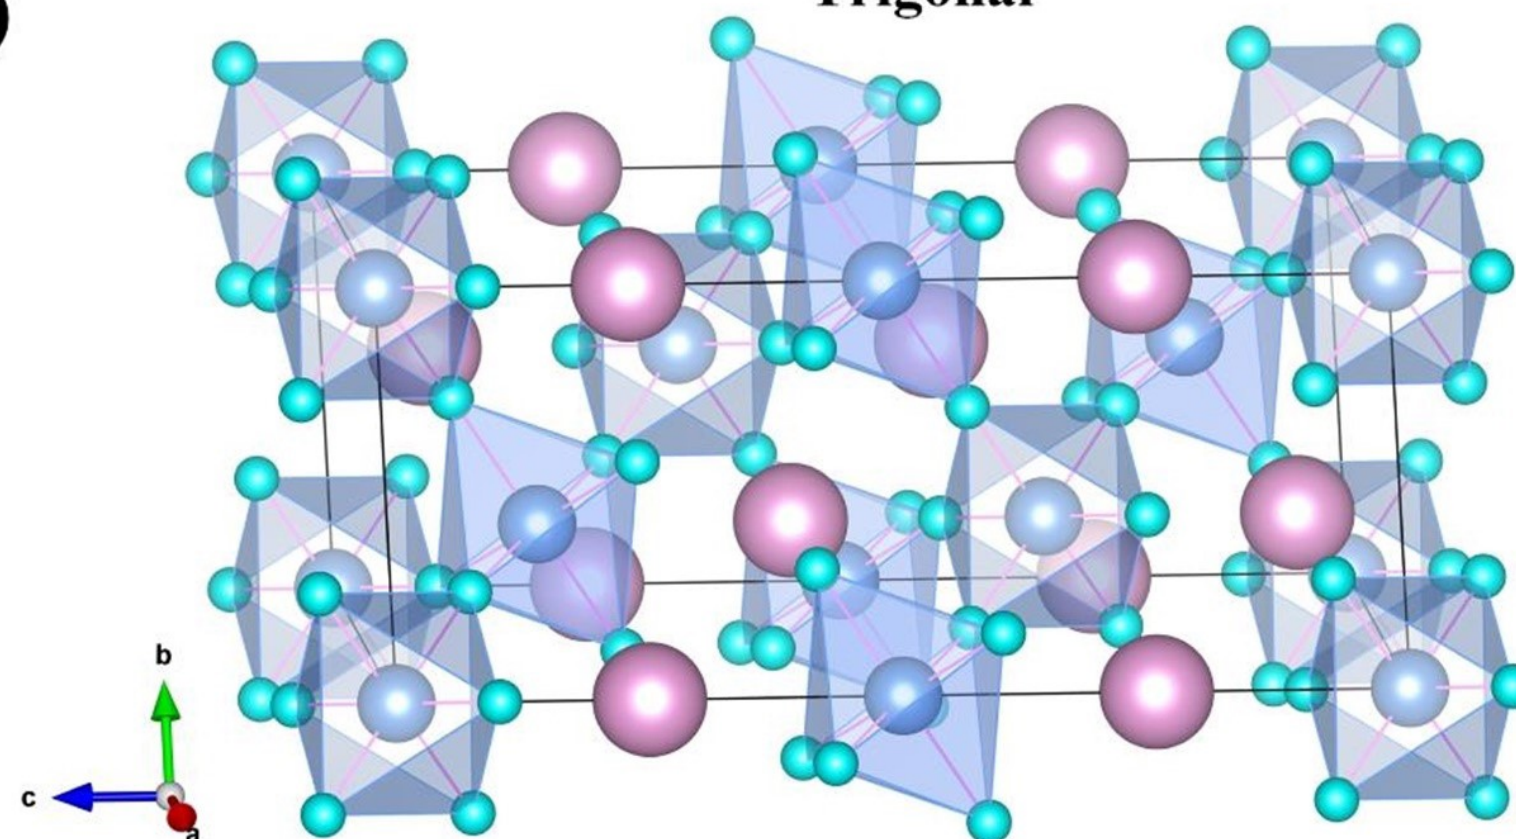

(f)

Triclinic

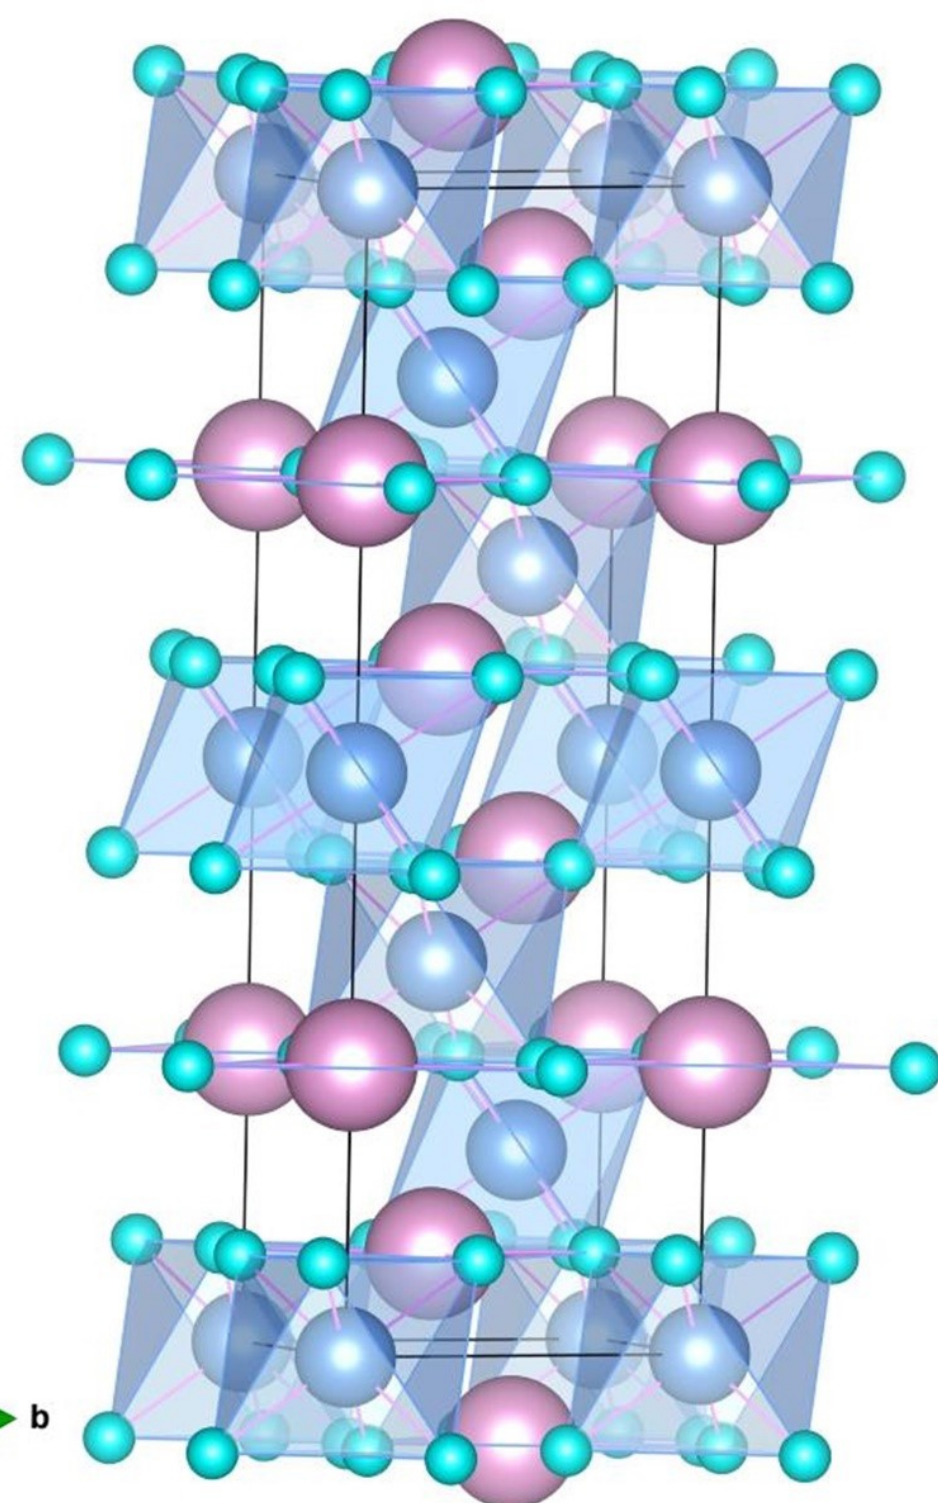

(g)

Orthorhombic

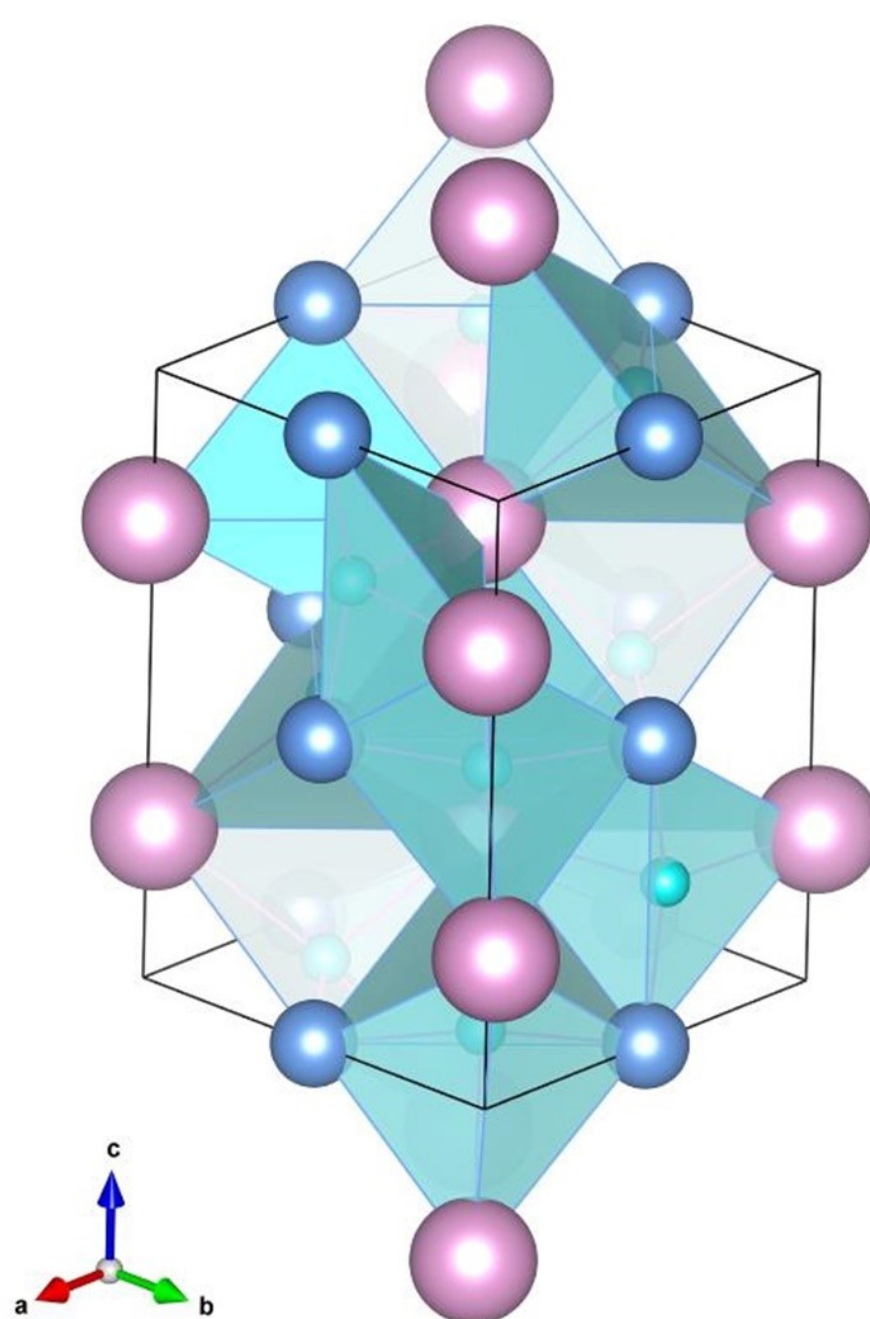

(h)

Monoclinic

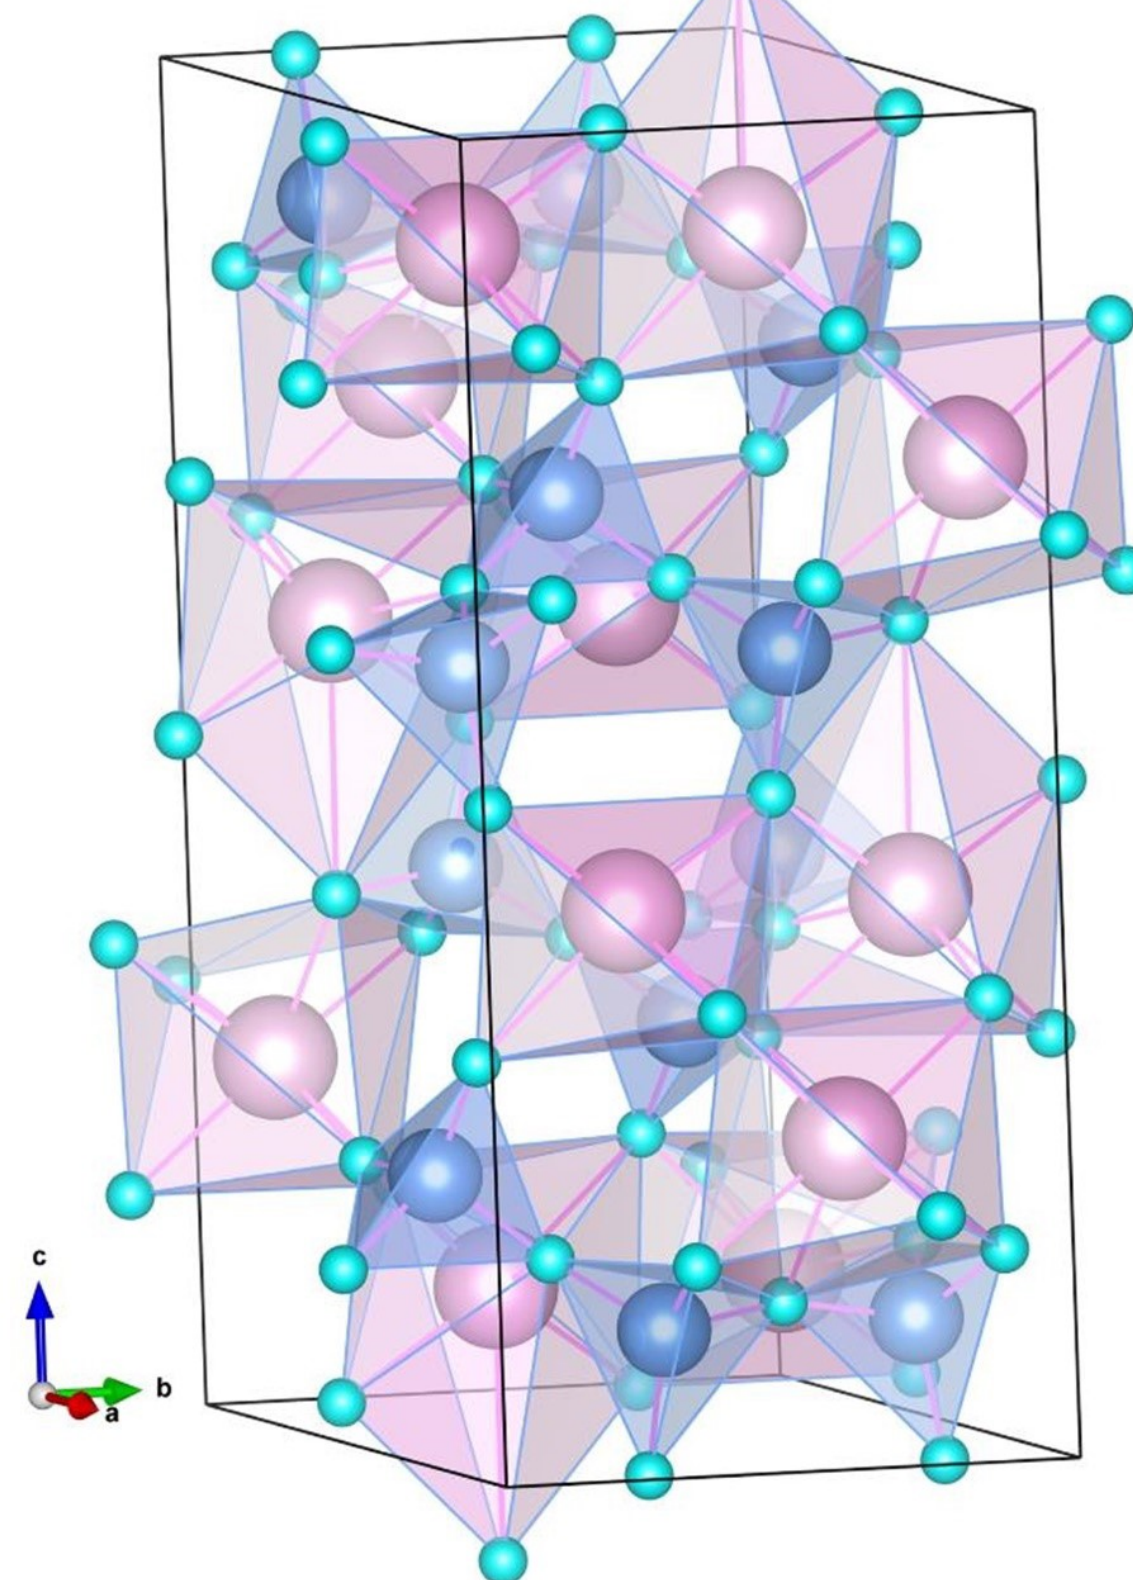

Supplement: d3cp01493b4.pdf [file d3cp01493b4.pdf]
