# Supplementary material for: Investigation of thermal control in phase-changing ABO3 perovskites via first-principles predictions: general mechanism of solar absorptivity
Source: Royal Society of Chemistry journal article supplement (doi:10.1039/d3cp01493b), 2023-01-01
Supplement: d3cp01493b8.pdf [file d3cp01493b8.pdf]

## SUPPLEMENTARY INFORMATION

### Investigation of thermal control in phase-changing ABO<sub>3</sub> perovskites via first-principles predictions: General mechanism of solar absorbance

Received 00th January 20xx,  
Accepted 00th January 20xx

DOI: 10.1039/x0xx00000x

Liping Tong<sup>a</sup>, Hongchao Li<sup>a</sup>, Hao Gong<sup>a</sup>, Nianao Xu<sup>a</sup>, Zhongyang Wang<sup>\* a</sup>, Qixin Guo<sup>b</sup>, Tongxiang Fan<sup>\* a</sup>

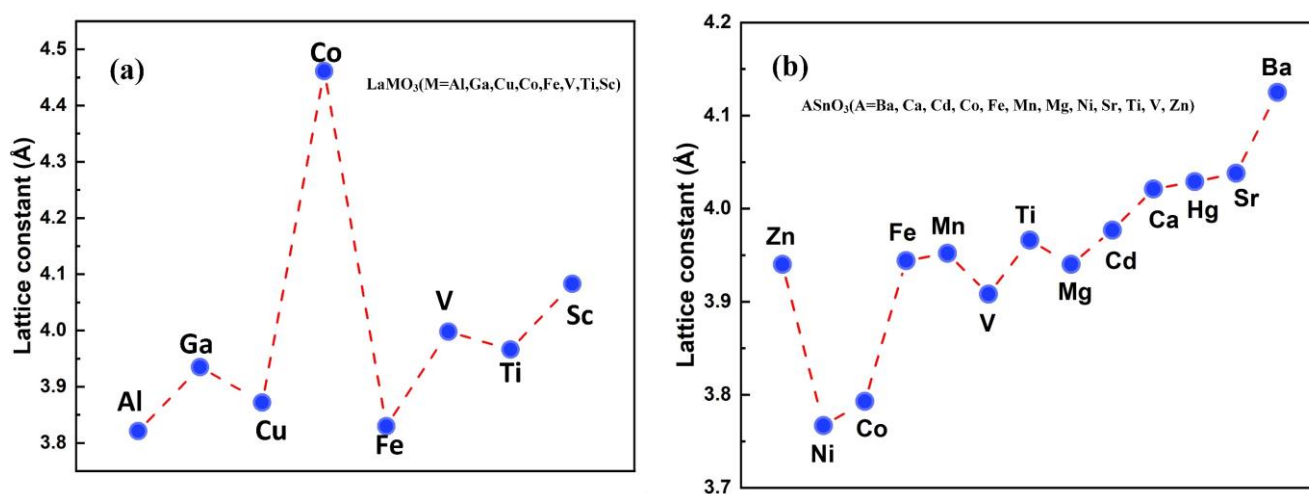

FIG. S1. Variation of lattice constant of cubic LaMO<sub>3</sub> (M=Al, Ga, Sc, Fe, Co, Cr, Ti, V) and ASnO<sub>3</sub> (A=Ba, Ca, Cd, Co, Fe, Mn, Mg, Ni, Sr, Ti, V, Zn).





## SUPPLEMENTARY INFORMATION

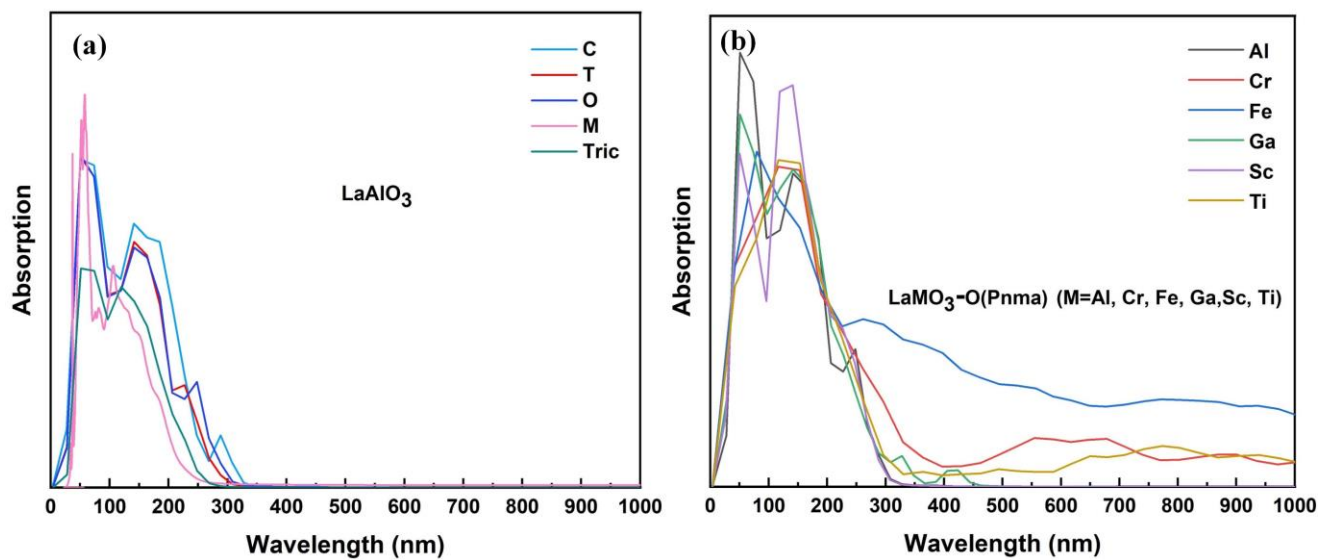

FIG. S4. Absorption spectra (0–1000nm) of LaAlO<sub>3</sub>-C, LaAlO<sub>3</sub>-T, LaAlO<sub>3</sub>-Tric, LaAlO<sub>3</sub>-M, LaAlO<sub>3</sub>-O, LaCrO<sub>3</sub>-O, LaFeO<sub>3</sub>-O, LaGaO<sub>3</sub>-O, LaScO<sub>3</sub>-O, and LaTiO<sub>3</sub>-O.

# SUPPLEMENTARY INFORMATION

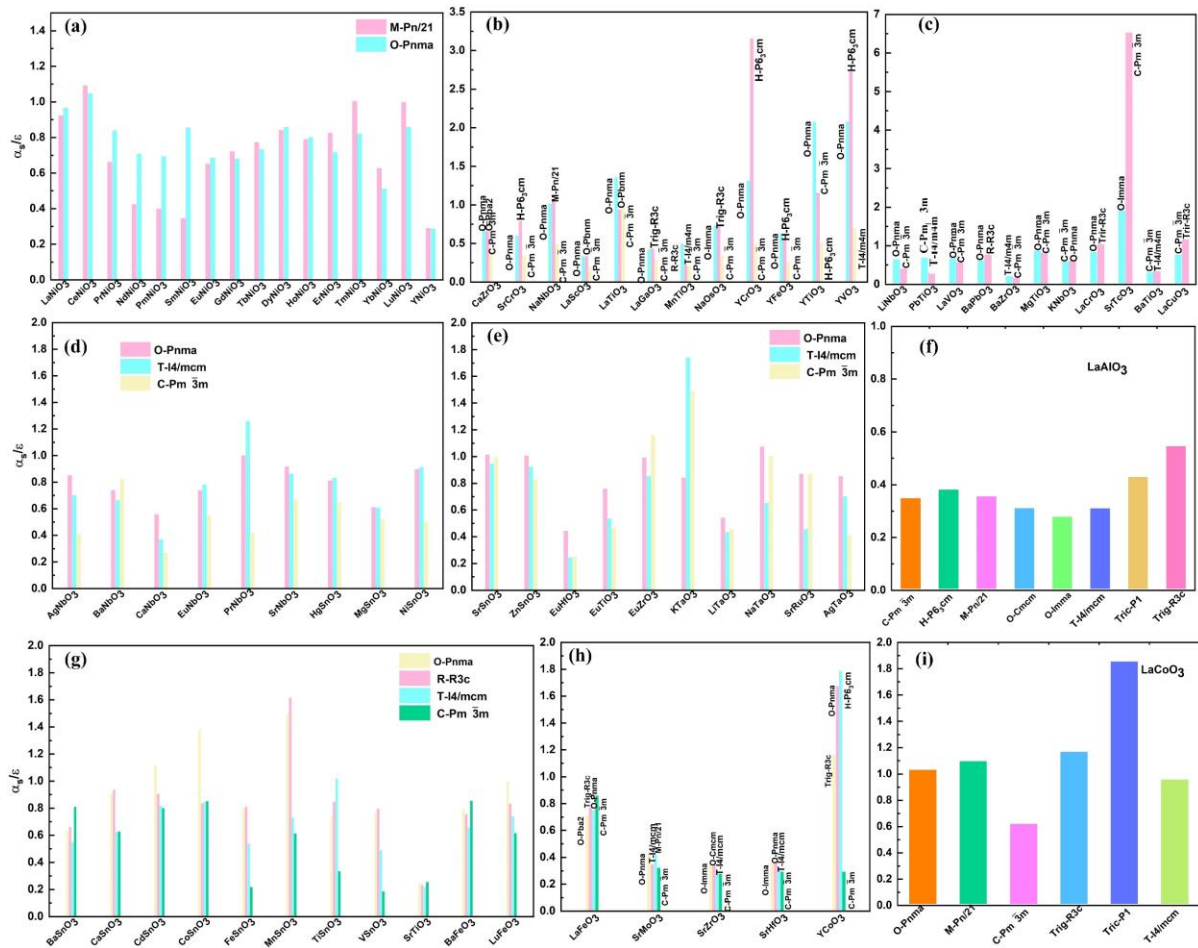

FIG. S5. The ratio of solar absorption (250-2500 nm) to IR emittance (2.5-25  $\mu\text{m}$ ) ( $\alpha_s/\epsilon$ ) of 76  $\text{ABO}_3$  perovskites.



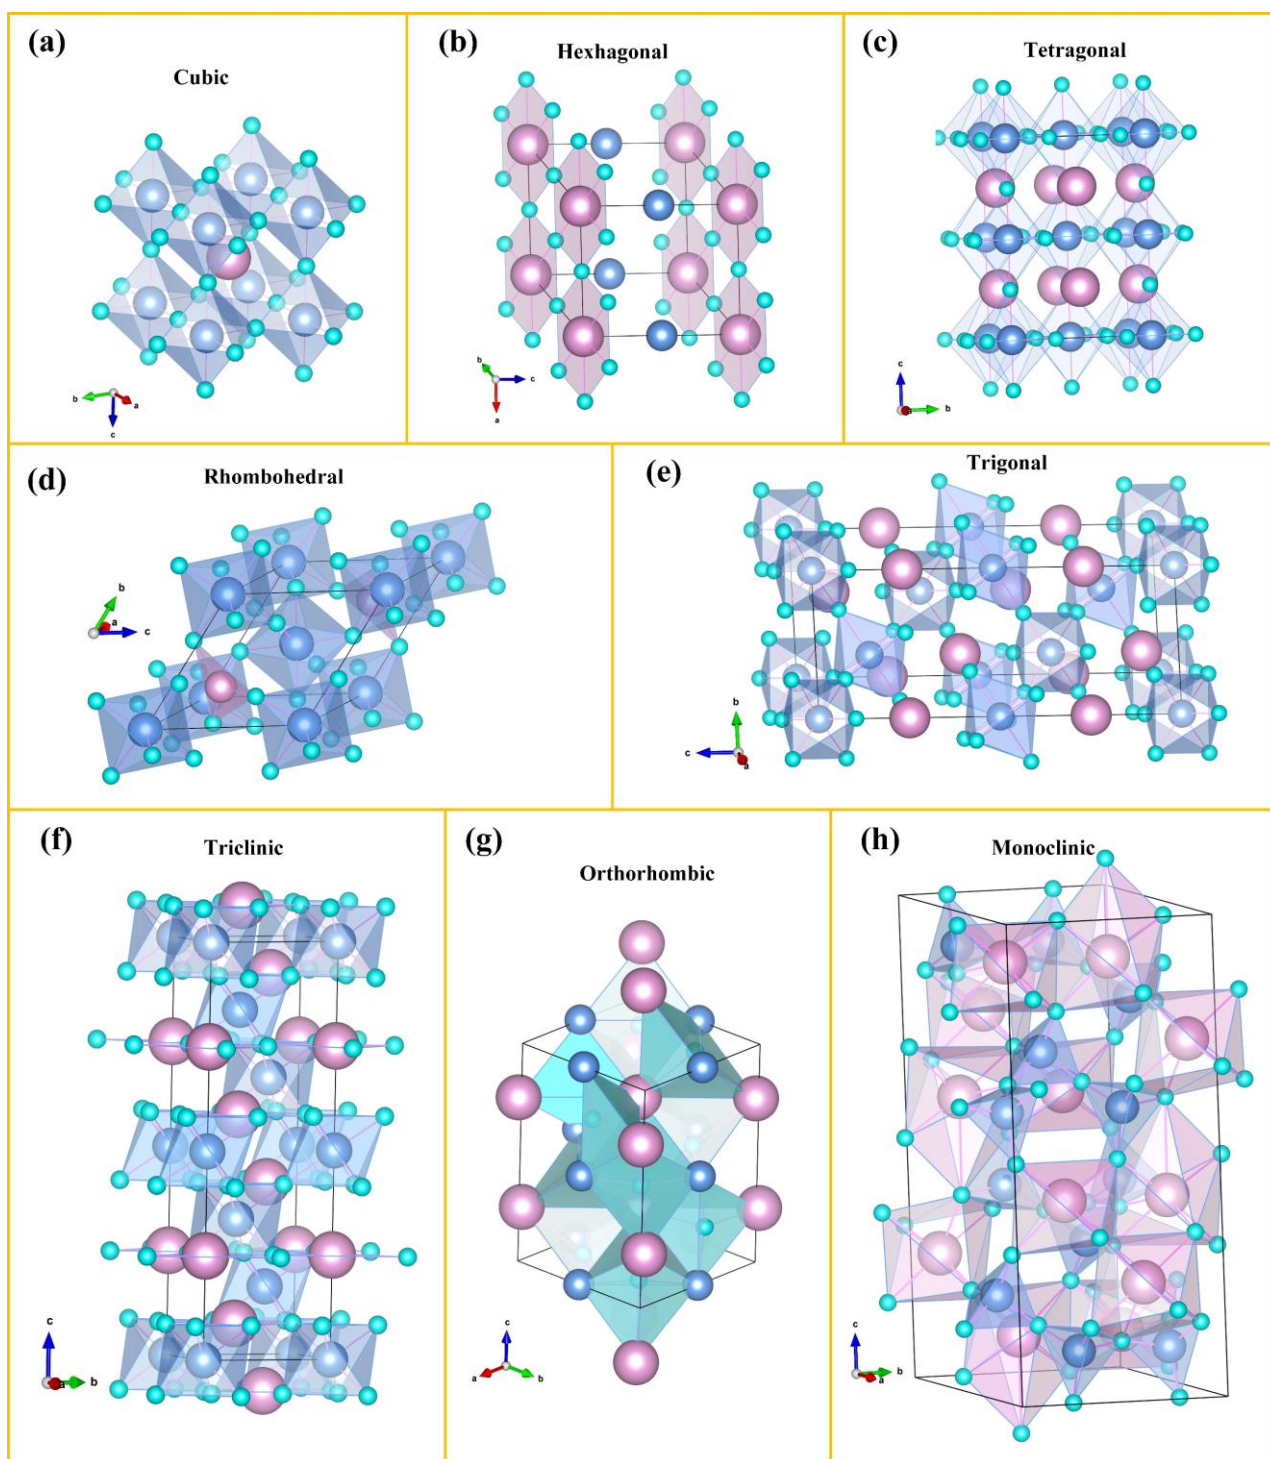

**FIG. S6.** The atomic models of Cubic (a), Hexagonal (b), Tetragonal (c), Rhombohedral (d), Trigonal (e), Triclinic (f), Orthorhombic (g), and Monoclinic (h) for  $ABO_3$  perovskites. The small turquoise balls are oxygen atoms, big darkslateblue balls are B-site atoms, and grey-pink balls are A-site atoms.

Table S1 Lattice constants and formation energies of 76 kinds of ABO<sub>3</sub> perovskites.

|                              | Lattice constants (Å)    | Formation energy (eV/atom) |                             | Lattice constants (Å)       | Formation energy (eV/atom) |
|------------------------------|--------------------------|----------------------------|-----------------------------|-----------------------------|----------------------------|
| AgNbO <sub>3</sub> -O(Pmc21) | a=5.645,b=5.748,c=15.743 | -3.19                      | MgTiO <sub>3</sub> -C       | a=b=c=3.832                 | -2.83978                   |
| AgNbO <sub>3</sub> -C        | a=b=c=4.024              | -3.159                     | MgTiO <sub>3</sub> -O       | a=5.103,b=5.308,c=7.469     | -2.93196                   |
| AgNbO <sub>3</sub> -O(Cmcm)  | a=7.92,b=7.965,c=8.017   | -3.279                     | MnSnO <sub>3</sub> -C       | a=b=c=3.952                 | -2.67861                   |
| AgNbO <sub>3</sub> -O(Pbcm)  | a=5.671,b=5.748,c=15.763 | -3.181                     | MnSnO <sub>3</sub> -O       | a=5.340,b=5.499,c=7.788     | -2.76962                   |
| AgNbO <sub>3</sub> -Te       | a=5.63,b=5.63,c=4.021    | -2.6418                    | MnSnO <sub>3</sub> -R       | a=5.355,b=4.638,c=14.674    | -2.77837                   |
| AgTaO <sub>3</sub> -C        | a=b=c=3.9993             | -3.409                     | MnSnO <sub>3</sub> -T       | a=5.492,b=5.492,c=7.809     | -2.73215                   |
| AgTaO <sub>3</sub> -O        | a=5.544,b=6.002,c=9.103  | -3.98989                   | MnTiO <sub>3</sub> -T       | a=5.492,b=5.492,c=7.809     | -2.96744                   |
| MnTiO <sub>3</sub> -C        | a=b=c=3.820              | -2.88798                   | MnTiO <sub>3</sub> -R       | a=5.511,b=4.669,c=4.348     | -3.03535                   |
| BaNbO <sub>3</sub> -O        | a=5.819,b=5.820,c=8.308  | -3.06098                   | NaOsO <sub>3</sub> -C       | a=b=c=3.877                 | -2.673                     |
| BaSnO <sub>3</sub> -C        | a=b=c=4.125              | -2.62801                   | NaOsO <sub>3</sub> -O       | a=5.391,b=5.431,c=7.653     | -2.666                     |
| BaSnO <sub>3</sub> -O        | a=5.826,b=5.827,c=8.238  | -2.62741                   | NaOsO <sub>3</sub> -Trig    | a=5.429,b=4.701,c=13.187    | -2.647                     |
| BaSnO <sub>3</sub> -R        | a=5.690,b=4.928,c=17.336 | -2.6052                    | NaTaO <sub>3</sub> -C       | a=b=c=4.008                 | -3.07331                   |
| BaSnO <sub>3</sub> -T        | a=5.841,b=5.841,c=8.224  | -2.62765                   | NaTaO <sub>3</sub> -T       | a=5.566,b=5.620,c=7.921     | -3.08139                   |
| BaTiO <sub>3</sub> -C        | a=b=c=4.482              | -2.10246                   | NiSnO <sub>3</sub> -C       | a=b=c=3.767                 | -2.41431                   |
| BaTiO <sub>3</sub> -T        | a=4.003,b=4.003,c=4.199  | -3.00279                   | NiSnO <sub>3</sub> -O       | a=5.367,b=5.229,c=7.660     | -2.54846                   |
| CaNbO <sub>3</sub> -C        | a=b=c=4.021              | -3.03918                   | NiSnO <sub>3</sub> -T       | a=5.495,b=5.495,c=7.565     | -2.4698                    |
| CaNbO <sub>3</sub> -O        | a=5.520,b=5.676,c=7.932  | -3.06056                   | PbTiO <sub>3</sub> -C       | a=b=c=3.960                 | -2.89245                   |
| CaSnO <sub>3</sub> -C        | a=b=c= 3.977             | -2.2287                    | CaSnO <sub>3</sub> -R       | a= 5.453,b= 5.453,c= 15.187 | -2.65349                   |
| CaSnO <sub>3</sub> -O        | a= 5.463,b=5.600,c=7.884 | -2.65375                   | CaSnO <sub>3</sub> -T       | a= 5.547,b=5.547,c=7.911    | -2.64205                   |
| CaNbO <sub>3</sub> -T        | a=5.578,b=5.578,c=4.042  | -3.05462                   | PbTiO <sub>3</sub> -T       | a=3.849,b=3.849,c=4.629     | -2.9025                    |
| CdSnO <sub>3</sub> -C        | a=b=c=3.977              | -2.29175                   | PrNbO <sub>3</sub> -C       | a=b=c=4.056                 | -3.14219                   |
| CdSnO <sub>3</sub> -O        | a=5.463,b=5.600,c=7.884  | -2.35864                   | PrNbO <sub>3</sub> -O       | a=5.833,b=5.734,c=7.988     | -3.15619                   |
| CdSnO <sub>3</sub> -R        | a=5.453,b=4.723,c=15.187 | -2.36544                   | PrNbO <sub>3</sub> -T       | a=5.581,b=5.581,c=4.211     | -3.15809                   |
| CdSnO <sub>3</sub> -T        | a=5.547,b=5.547,c=7.911  | -2.33707                   | SrCrO <sub>3</sub> -C       | a=b=c=3.821                 | -2.8868                    |
| CeNiO <sub>3</sub> -O        | a=5.243,b=6.493,c=6.990  | -2.89911                   | SrCrO <sub>3</sub> -H       | a=5.465,b=4.733,c=13.333    | -3.83352                   |
| CoSnO <sub>3</sub> -C        | a=b=c= 3.793             | -2.34985                   | SrHfO <sub>3</sub> -C       | a=b=c=4.141                 | -3.30398                   |
| CoSnO <sub>3</sub> -O        | a=5.343,b=5.341,c=7.676  | -2.57128                   | SrHfO <sub>3</sub> -O(Cmcm) | a=8.182,b=8.270,c=8.229     | -3.3081                    |
| CoSnO <sub>3</sub> -R        | a=5.280,b=4.572,c=14.198 | -2.58095                   | SrHfO <sub>3</sub> -O(Imma) | a=5.827,b=5.837,c=8.187     | -3.31168                   |
| CoSnO <sub>3</sub> -T        | a=5.440,b=4.440,c=7.800  | -2.50386                   | SrHfO <sub>3</sub> -O(Pnma) | a=5.800,b=5.833,c=8.213     | -3.31239                   |
| EuHfO <sub>3</sub> -C        | a=b=c= 4.106             | -3.34513                   | SrHfO <sub>3</sub> -T       | a=4.138,b=4.138,c=4.147     | -3.30397                   |
| EuHfO <sub>3</sub> -O        | a=5.559,b=6.118,c=7.704  | -3.40063                   | SrMoO <sub>3</sub> -C       | a=b=c=4.001                 | -2.97663                   |
| EuHfO <sub>3</sub> -T        | a=5.612,b=5.612,c=8.426  | -3.38028                   | SrMoO <sub>3</sub> -M       | a=5.727,b=7.934,c=5.670     | -2.97392                   |
| EuNbO <sub>3</sub> -O(Imma)  | a=5.992,b=5.517,c=7.887  | -3.15449                   | SrMoO <sub>3</sub> -O(Imma) | a=5.662,b=5.678,c=7.937     | -2.97641                   |
| EuNbO <sub>3</sub> -T        | a=5.509,b=5.509,c=4.165  | -3.14735                   | SrMoO <sub>3</sub> -T       | a=5.677,b=5.677,c=7.939     | -2.97661                   |
| EuZrO <sub>3</sub> -C        | a=b=c=4.137              | -3.11453                   | SrNbO <sub>3</sub> -C       | a=b=c=4.062                 | -3.04892                   |
| EuZrO <sub>3</sub> -O        | a=5.605,b=6.108,c=7.785  | -3.18827                   | SrNbO <sub>3</sub> -O       | a=5.709,b=5.712,c=8.148     | -3.05182                   |
| EuZrO <sub>3</sub> -T        | a=5.648,b=5.648,c=8.464  | -3.15694                   | SrNbO <sub>3</sub> -T       | a=5.712,b=5.712,c=4.087     | -3.05092                   |
| FeSnO <sub>3</sub> -C        | a=b=c=3.944              | -2.54068                   | SrRuO <sub>3</sub> -C       | a=b=c=3.956                 | -2.72338                   |
| FeSnO <sub>3</sub> -O        | a=5.365,b=5.405,c=7.711  | -2.66128                   | SrRuO <sub>3</sub> -O       | a=5.580,b=5.618,c=7.889     | -2.73147                   |
| FeSnO <sub>3</sub> -R        | a=5.337,b=4.576,c=14.489 | -2.66816                   | SrRuO <sub>3</sub> -T       | a=5.593,b=5.593,c=7.887     | -2.73058                   |
| FeSnO <sub>3</sub> -T        | a=5.472,b=5.472,c=7.713  | -2.61383                   | SrSnO <sub>3</sub> -C       | a=b=c=4.038                 | -2.62636                   |
| HgSnO <sub>3</sub> -C        | a=b=c=4.029              | -2.20568                   | SrSnO <sub>3</sub> -O       | a=5.710,b=5.701,c=8.061     | -2.63118                   |
| HgSnO <sub>3</sub> -O        | a=5.577,b=5.626,c=7.997  | -2.25823                   | SrSnO <sub>3</sub> -T       | a=5.666,b=5.666,c=8.181     | -2.63035                   |
| HgSnO <sub>3</sub> -T        | a=5.638,b=5.638,c=7.931  | -2.24854                   | SrTcO <sub>3</sub> -C       | a=b=c=3.961                 | -2.463                     |

## SUPPLEMENTARY INFORMATION

|                             |                               |          |                             |                           |          |
|-----------------------------|-------------------------------|----------|-----------------------------|---------------------------|----------|
| KTaO <sub>3</sub> -C        | a=b=c=4.031                   | -3.05692 | SrTcO <sub>3</sub> -O(Imma) | a=5.583,b=5.604,c=7.941   | -3.462   |
| KTaO <sub>3</sub> -O        | a=5.707,b=5.695,c=8.066       | -3.05677 | SrTiO <sub>3</sub> -C       | a=b=c=3.942               | -3.00751 |
| LaAlO <sub>3</sub> -C       | a=b=c=3.821                   | -2.99468 | SrTiO <sub>3</sub> -O       | a=5.573,b=5.575,c=7.881   | -3.00689 |
| LaAlO <sub>3</sub> -H       | a=4.755,b=4.119,c=6.537       | -2.26354 | SrTiO <sub>3</sub> -R       | a=5.573,b=5.573,c=5.573   | -3.00702 |
| LaAlO <sub>3</sub> -O(Imma) | a=5.428,b=5.430,c=7.631       | -2.95439 | SrTiO <sub>3</sub> -T       | a=5.568,b=5.568,c=7.907   | -3.00766 |
| LaAlO <sub>3</sub> -O(Cmcm) | a=7.158,b=12.434,c=10.28<br>g | -2.98019 | SrZrO <sub>3</sub> -C       | a=b=c=4.175               | -3.07009 |
| LaAlO <sub>3</sub> -T       | a=5.384,b=5.384,c=7.784       | -2.95762 | SrZrO <sub>3</sub> -O(Imma) | a=5.867,b=5.869,c= 8.231  | -3.07993 |
| LaAlO <sub>3</sub> -Tric    | a=7.281,b=7.682,c=8.442       | -2.98166 | SrZrO <sub>3</sub> -O(Pnma) | a=5.819,b=5.885,c= 8.259  | -2.97273 |
| LaAlO <sub>3</sub> -Trig    | a=5.430,b=4.692,c=13.261      | -2.97003 | SrZrO <sub>3</sub> -T       | a=4.156,b=4.156,c=4.252   | -3.07039 |
| LaCoO <sub>3</sub> -O       | a=5.467,b=5.550,c=7.810       | -2.75185 | TiSnO <sub>3</sub> -C       | a=b=c=3.966               | -2.76035 |
| LaCoO <sub>3</sub> -C       | a=b=c=4.461                   | -2.12355 | TiSnO <sub>3</sub> -O       | a=5.511,b=5.533,c=7.676   | -2.72487 |
| LaCoO <sub>3</sub> -M       | a=6.551,b=5.092,c=4.711       | -2.69256 | TiSnO <sub>3</sub> -R       | a=5.161,b=5.161,c=21.244  | -2.80835 |
| LaCoO <sub>3</sub> -T       | a=5.391,b=5.391,c=7.682       | -2.73486 | TiSnO <sub>3</sub> -T       | a=5.797,b=5.548,c=7.947   | -2.7643  |
| LaCrO <sub>3</sub> -O       | a=5.483,b=5.466,c=7.763       | -3.09579 | VSrO <sub>3</sub> -C        | a=b=c=3.908               | -2.66184 |
| LaCrO <sub>3</sub> -Trig    | a=5.496,b=4.760,c=13.292      | -3.0959  | VSrO <sub>3</sub> -O        | a=5.347,b=5.557,c=7.710   | -2.73003 |
| LaCuO <sub>3</sub> -Trig    | a=5.565,b=4.819,c=13.199      | -3.297   | VSrO <sub>3</sub> -R        | a=5.106,b=5.091,c= 20.244 | -2.71488 |
| LaCuO <sub>3</sub> -C       | a=b=c=3.872                   | -3.268   | LaFeO <sub>3</sub> -C       | a=b=c=3.830               | -2.77208 |
| LaGaO <sub>3</sub> -C       | a=b=c=3.935                   | -2.78937 | VSrO <sub>3</sub> -T        | a=5.336,b=5.553,c=7.700   | -2.71761 |
| LaGaO <sub>3</sub> -O(Imma) | a=5.564,b=5.622,c=7.884       | -2.80447 | YCoO <sub>3</sub> -C        | a=b=c=3.735               | -3.431   |
| LaScO <sub>3</sub> -C       | a=b=c=4.083                   | -3.13486 | YCoO <sub>3</sub> -H        | a=3.498,b=3.498,c=11.493  | -3.556   |
| LaScO <sub>3</sub> -O(Pbnm) | a=5.720,b=5.849,c=8.182       | -3.18157 | YCoO <sub>3</sub> -O        | a=5.154,b=5.524,c=7.389   | -3.661   |
| LaScO <sub>3</sub> -O(Pnma) | a=5.719,b=5.853,c=8.161       | -3.18167 | YCoO <sub>3</sub> -Trig     | a=5.146,b=5.528,c=7.391   | -3.65    |
| LaTiO <sub>3</sub> -C       | a=b=c=3.959                   | -3.17187 | YCrO <sub>3</sub> -C        | a=b=c=3.774               | -2.908   |
| LaTiO <sub>3</sub> -O(Pbnm) | a=5.631,b=5.621,c=7.954       | -3.17977 | YCrO <sub>3</sub> -H        | a=3.498,b=3.498,c=11.493  | -3.032   |
| LaTiO <sub>3</sub> -O(Pnma) | a=5.584,b=5.679,c=7.950       | -3.18063 | YCrO <sub>3</sub> -O(Pnma)  | a=5.180,b=5.577,c=7.476   | -3.212   |
| LaVO <sub>3</sub> -C        | a=b=c=3.998                   | -3.14085 | YFeO <sub>3</sub> -C        | a=b=c=3.736               | -2.603   |
| LaVO <sub>3</sub> -O(Pbnm)  | a=5.548,b=7.795,c=5.532       | -3.14304 | YFeO <sub>3</sub> -H        | a=3.498,b=3.498,c=11.493  | -2.935   |
| LiTaO <sub>3</sub> -C       | a=b=c=3.966                   | -3.07331 | YFeO <sub>3</sub> -O        | a=5.148,b=5.520,c=7.407   | -2.932   |
| LiTaO <sub>3</sub> -O       | a=4.752,b=5.120,c=8.836       | -3.08139 | YTiO <sub>3</sub> -C        | a=b=c=3.893               | -3.576   |
| LiTaO <sub>3</sub> -T       | a=5.430,b=5.430,c=3.944       | -3.08729 | YTiO <sub>3</sub> -H        | a=6.073,b=6.073,c=11.997  | -3.624   |
| MgSnO <sub>3</sub> -C       | a=b=c=3.940                   | -2.45401 | YTiO <sub>3</sub> -O        | a=5.328,b=5.688,c=7.690   | -3.166   |
| MgSnO <sub>3</sub> -O       | a=5.255,b=5.398,c=7.701       | -2.57542 | YVO <sub>3</sub> -O         | a=5.235,b=5.629,c=7.559   | -3.28    |
| MgSnO <sub>3</sub> -T       | a=5.465,b=5.465,c=7.733       | -2.51587 | YVO <sub>3</sub> -T         | a=3.819,b=3.819,c=3.819   | -2.927   |
| ZnSnO <sub>3</sub> -C       | a=b=c=3.940                   | -2.26759 | ZnSnO <sub>3</sub> -T       | a=5.510,b=5.510,c=7.592   | -1.34911 |
| ZnSnO <sub>3</sub> -O       | a=5.265,b=5.314,c=7.767       | -2.41496 | YVO <sub>3</sub> -H         | a=3.449,b=3.449,c=12.143  | -3.126   |



SUPPLEMENTARY INFORMATION

Table S2. Bandgap (indirect gap or direct gap)  $E_g$  and the average solar absorptivity ( $\alpha_s$ ) of 76 kinds of  $ABO_3$  perovskites.

|                              | Bandgap ( $E_g$ ) | Type of Bandgap | Solar absorption |                             | Bandgap ( $E_g$ ) | Type of Bandgap | Solar absorption |
|------------------------------|-------------------|-----------------|------------------|-----------------------------|-------------------|-----------------|------------------|
| AgNbO <sub>3</sub> -O(Pmc21) | 2.902             | Indirect gap    | 0.63122          | MgTiO <sub>3</sub> -C       | 2.901             | Direct gap      | 0.48575          |
| AgNbO <sub>3</sub> -C        | 2.801             | Indirect gap    | 0.41192          | MgTiO <sub>3</sub> -O       | 3.701             | Direct gap      | 0.209            |
| AgNbO <sub>3</sub> -O(Cmcm)  | 2.001             | Indirect gap    | 0.68974          | MnSnO <sub>3</sub> -C       | 1.9               | Indirect gap    | 0.62177          |
| AgNbO <sub>3</sub> -O(Pbcm)  | 3.002             | Indirect gap    | 0.63589          | MnSnO <sub>3</sub> -O       | 2.403             | Direct gap      | 0.42518          |
| AgNbO <sub>3</sub> -Te       | 2.401             | Direct gap      | 0.62326          | MnSnO <sub>3</sub> -R       | 2.99              | Direct gap      | 0.43699          |
| AgTaO <sub>3</sub> -C        | 3.601             | Indirect gap    | 0.40332          | MnSnO <sub>3</sub> -T       | 1.903             | Direct gap      | 0.68203          |
| AgTaO <sub>3</sub> -O        | 3.467             | Indirect gap    | 0.46679          | MnTiO <sub>3</sub> -T       | 2.087             | Direct gap      | 0.16445          |
| MnTiO <sub>3</sub> -C        | 2.3694            | Indirect gap    | 0.12480          | MnTiO <sub>3</sub> -R       | 2.4825            | Direct gap      | 0.49614          |
| BaNbO <sub>3</sub> -O        | 2.901             | Indirect gap    | 0.41103          | NaOsO <sub>3</sub> -C       | 0.8               | Indirect gap    | 0.77864          |
| BaSnO <sub>3</sub> -C        | 1.501             | Indirect gap    | 0.58523          | NaOsO <sub>3</sub> -O       | 0.12              | Indirect gap    | 0.77804          |
| BaSnO <sub>3</sub> -O        | 2.1               | Direct gap      | 0.61152          | NaOsO <sub>3</sub> -Trig    | 0.04              | Indirect gap    | 0.11142          |
| BaSnO <sub>3</sub> -R        | 2.001             | Direct gap      | 0.60561          | NaTaO <sub>3</sub> -C       | 3.4712            | Indirect gap    | 0.37696          |
| BaSnO <sub>3</sub> -T        | 2.601             | Direct gap      | 0.66139          | NaTaO <sub>3</sub> -T       | 3.491             | Indirect gap    | 0.36525          |
| BaTiO <sub>3</sub> -C        | 3.201             | Direct gap      | 0.19601          | NiSnO <sub>3</sub> -C       | 3.703             | Indirect gap    | 0.27575          |
| BaTiO <sub>3</sub> -T        | 3.402             | Direct gap      | 0.29145          | NiSnO <sub>3</sub> -O       | 3.903             | Direct gap      | 0.20186          |
| CaNbO <sub>3</sub> -C        | 4.13              | Indirect gap    | 0.13759          | NiSnO <sub>3</sub> -T       | 3.603             | Indirect gap    | 0.21212          |
| CaNbO <sub>3</sub> -O        | 4.302             | Direct gap      | 0.18585          | PbTiO <sub>3</sub> -C       | 3.403             | Indirect gap    | 0.27806          |
| CaNbO <sub>3</sub> -T        | 4.201             | Indirect gap    | 0.23505          | PbTiO <sub>3</sub> -T       | 3.301             | Indirect gap    | 0.30568          |
| CaSnO <sub>3</sub> -C        | 2.16              | Indirect gap    | 0.64320          | CaSnO <sub>3</sub> -R       | 3.03              | Direct gap      | 0.95321          |
| CaSnO <sub>3</sub> -O        | 2.83              | Direct gap      | 0.93763          | CaSnO <sub>3</sub> -T       | 2.33              | Direct gap      | 0.63689          |
| CdSnO <sub>3</sub> -C        | 2.802             | Indirect gap    | 0.68513          | PrNbO <sub>3</sub> -C       | 3.602             | Direct gap      | 0.27958          |
| CdSnO <sub>3</sub> -O        | 3.02              | Direct gap      | 0.30635          | PrNbO <sub>3</sub> -O       | 3.902             | Direct gap      | 0.27161          |
| CdSnO <sub>3</sub> -R        | 2.957             | Indirect gap    | 0.31586          | PrNbO <sub>3</sub> -T       | 3.401             | Direct gap      | 0.31951          |
| CdSnO <sub>3</sub> -T        | 2.901             | Direct gap      | 0.3017           | SrCrO <sub>3</sub> -C       | 2.3288            | Direct gap      | 0.50093          |
| CeNiO <sub>3</sub> -O        | 1.703             | Indirect gap    | 0.39177          | SrCrO <sub>3</sub> -H       | 2.3239            | Direct gap      | 0.51435          |
| CoSnO <sub>3</sub> -C        | 2.93              | Direct gap      | 0.73781          | SrHfO <sub>3</sub> -C       | 5.903             | Indirect gap    | 0.16496          |
| CoSnO <sub>3</sub> -O        | 2.876             | Direct gap      | 0.31561          | SrHfO <sub>3</sub> -O(Cmcm) | 6.103             | Indirect gap    | 0.13332          |
| CoSnO <sub>3</sub> -R        | 2.702             | Direct gap      | 0.31564          | SrHfO <sub>3</sub> -O(Imma) | 6.101             | Indirect gap    | 0.13317          |
| CoSnO <sub>3</sub> -T        | 2.801             | Direct gap      | 0.28874          | SrHfO <sub>3</sub> -O(Pnma) | 6.101             | Indirect gap    | 0.13164          |
| EuHfO <sub>3</sub> -C        | 2.5619            | Direct gap      | 0.20503          | SrHfO <sub>3</sub> -T       | 6.003             | Indirect gap    | 0.16281          |
| EuHfO <sub>3</sub> -O        | 4.5469            | Direct gap      | 0.10976          | SrMoO <sub>3</sub> -C       | 1.909             | Indirect gap    | 0.46023          |
| EuHfO <sub>3</sub> -T        | 4.0426            | Direct gap      | 0.16003          | SrMoO <sub>3</sub> -M       | 1.906             | Indirect gap    | 0.4625           |
| EuNbO <sub>3</sub> -O(Imma)  | 0.801             | Direct gap      | 0.85015          | SrMoO <sub>3</sub> -O(Imma) | 2.001             | Indirect gap    | 0.46431          |
| EuNbO <sub>3</sub> -T        | 0.603             | Indirect gap    | 0.76682          | SrMoO <sub>3</sub> -T       | 2.003             | Indirect gap    | 0.46201          |
| EuZrO <sub>3</sub> -C        | 2.513             | Direct gap      | 0.41664          | SrNbO <sub>3</sub> -C       | 4.202             | Indirect gap    | 0.16777          |
| EuZrO <sub>3</sub> -O        | 2.402             | Direct gap      | 0.42632          | SrNbO <sub>3</sub> -O       | 4.102             | Direct gap      | 0.14598          |
| EuZrO <sub>3</sub> -T        | 2.957             | Direct gap      | 0.35886          | SrNbO <sub>3</sub> -T       | 4.152             | Indirect gap    | 0.12392          |
| FeSnO <sub>3</sub> -C        | 0.1               | Indirect gap    | 0.31318          | SrRuO <sub>3</sub> -C       | 0.4               | Indirect gap    | 0.70673          |
| FeSnO <sub>3</sub> -O        | 1.903             | Indirect gap    | 0.79484          | SrRuO <sub>3</sub> -O       | 0.6               | Direct gap      | 0.70114          |
| FeSnO <sub>3</sub> -R        | 2.09              | Indirect gap    | 0.74697          | SrRuO <sub>3</sub> -T       | 0.52              | Direct gap      | 0.6952           |

## SUPPLEMENTARY INFORMATION

|                             |        |              |         |                             |         |              |         |
|-----------------------------|--------|--------------|---------|-----------------------------|---------|--------------|---------|
| FeSnO <sub>3</sub> -T       | 1.67   | Indirect gap | 0.83603 | SrSnO <sub>3</sub> -C       | 4.102   | Indirect gap | 0.34863 |
| HgSnO <sub>3</sub> -C       | 1.49   | Indirect gap | 0.85225 | SrSnO <sub>3</sub> -O       | 4.002   | Direct gap   | 0.34729 |
| HgSnO <sub>3</sub> -O       | 1.622  | Direct gap   | 0.78759 | SrSnO <sub>3</sub> -T       | 3.902   | Direct gap   | 0.34538 |
| HgSnO <sub>3</sub> -T       | 1.506  | Direct gap   | 0.79504 | SrTcO <sub>3</sub> -C       | 0.7     | Indirect gap | 0.74134 |
| KTaO <sub>3</sub> -C        | 3.2632 | Indirect gap | 0.42122 | SrTcO <sub>3</sub> -O(Imma) | 1.7     | Indirect gap | 0.70477 |
| KTaO <sub>3</sub> -O        | 3.2565 | Direct gap   | 0.42084 | SrTiO <sub>3</sub> -C       | 3.439   | Indirect gap | 0.37509 |
| LaAlO <sub>3</sub> -C       | 4.702  | Indirect gap | 0.26144 | SrTiO <sub>3</sub> -O       | 3.202   | Direct gap   | 0.3688  |
| LaAlO <sub>3</sub> -H       | 1.701  | Indirect gap | 0.66519 | SrTiO <sub>3</sub> -R       | 3.242   | Direct gap   | 0.3664  |
| LaAlO <sub>3</sub> -O(Imma) | 6.003  | Direct gap   | 0.13001 | SrTiO <sub>3</sub> -T       | 3.152   | Direct gap   | 0.36895 |
| LaAlO <sub>3</sub> -O(Cmcm) | 5.602  | Direct gap   | 0.12928 | SrZrO <sub>3</sub> -C       | 5.403   | Indirect gap | 0.23758 |
| LaAlO <sub>3</sub> -T       | 4.502  | Direct gap   | 0.33014 | SrZrO <sub>3</sub> -O(Imma) | 5.603   | Direct gap   | 0.29905 |
| LaAlO <sub>3</sub> -Tric    | 5.703  | Indirect gap | 0.14191 | SrZrO <sub>3</sub> -O(Pnma) | 5.603   | Direct gap   | 0.29616 |
| LaAlO <sub>3</sub> -Trig    | 4.702  | Indirect gap | 0.29115 | SrZrO <sub>3</sub> -T       | 5.503   | Indirect gap | 0.20103 |
| LaCoO <sub>3</sub> -O       | 0.53   | Direct gap   | 0.73586 | TiSnO <sub>3</sub> -C       | 2.451   | Indirect gap | 0.67858 |
| LaCoO <sub>3</sub> -C       | 1.2    | Indirect gap | 0.64196 | TiSnO <sub>3</sub> -O       | 1.801   | Direct gap   | 0.68789 |
| LaCoO <sub>3</sub> -M       | 0.403  | Indirect gap | 0.69477 | TiSnO <sub>3</sub> -R       | 1.701   | Indirect gap | 0.66412 |
| LaCoO <sub>3</sub> -T       | 0.5    | Indirect gap | 0.71563 | TiSnO <sub>3</sub> -T       | 2.601   | Indirect gap | 0.67363 |
| LaCrO <sub>3</sub> -O       | 3.325  | Direct gap   | 0.71188 | VSnO <sub>3</sub> -C        | 0.8     | Indirect gap | 0.85615 |
| LaCrO <sub>3</sub> -Trig    | 3.3041 | Direct gap   | 0.66982 | VSnO <sub>3</sub> -O        | 0.6     | Direct gap   | 0.78433 |
| LaCuO <sub>3</sub> -Trig    | 0.3    | Direct gap   | 0.68003 | VSnO <sub>3</sub> -R        | 1       | Indirect gap | 0.86672 |
| LaGaO <sub>3</sub> -C       | 4.602  | Indirect gap | 0.22485 | VSnO <sub>3</sub> -T        | 0.5     | Direct gap   | 0.88506 |
| LaGaO <sub>3</sub> -O(Imma) | 4.703  | Indirect gap | 0.2778  | YCoO <sub>3</sub> -C        | 2.301   | Indirect gap | 0.43828 |
| LaScO <sub>3</sub> -C       | 5.403  | Direct gap   | 0.13726 | YCoO <sub>3</sub> -H        | 2.601   | Indirect gap | 0.46133 |
| LaScO <sub>3</sub> -O(Pbnm) | 5.803  | Direct gap   | 0.29375 | YCoO <sub>3</sub> -O        | 2.701   | Direct gap   | 0.52939 |
| LaScO <sub>3</sub> -O(Pnma) | 5.703  | Direct gap   | 0.29389 | YCoO <sub>3</sub> -Trig     | 2.751   | Direct gap   | 0.50459 |
| LaTiO <sub>3</sub> -C       | 0.001  | Direct gap   | 0.01298 | YCrO <sub>3</sub> -C        | 2.001   | Indirect gap | 0.58541 |
| LaTiO <sub>3</sub> -O(Pbnm) | 0.7    | Direct gap   | 0.75572 | YCrO <sub>3</sub> -H        | 1.1     | Indirect gap | 0.74647 |
| LaTiO <sub>3</sub> -O(Pnma) | 1.2    | Direct gap   | 0.888   | YCrO <sub>3</sub> -O(Pnma)  | 1.7     | Direct gap   | 0.71199 |
| LaVO <sub>3</sub> -C        | 0.6576 | Indirect gap | 0.82134 | YFeO <sub>3</sub> -C        | 1.3     | Indirect gap | 0.71008 |
| LaVO <sub>3</sub> -O(Pbnm)  | 1.0997 | Direct gap   | 0.76444 | YFeO <sub>3</sub> -H        | 0.3     | Indirect gap | 0.81992 |
| LiTaO <sub>3</sub> -C       | 3.1804 | Indirect gap | 0.30298 | YFeO <sub>3</sub> -O        | 1.2     | Indirect gap | 0.71369 |
| LiTaO <sub>3</sub> -O       | 3.0795 | Indirect gap | 0.31805 | YTiO <sub>3</sub> -C        | 4.102   | Indirect gap | 0.20153 |
| LiTaO <sub>3</sub> -T       | 3.6154 | Indirect gap | 0.27185 | YTiO <sub>3</sub> -H        | 4.203   | Indirect gap | 0.27712 |
| MgSnO <sub>3</sub> -C       | 3.007  | Indirect gap | 0.4982  | YTiO <sub>3</sub> -O        | 3.102   | Indirect gap | 0.33455 |
| MgSnO <sub>3</sub> -O       | 4.03   | Indirect gap | 0.36323 | YVO <sub>3</sub> -O         | 2.601   | Indirect gap | 0.46821 |
| MgSnO <sub>3</sub> -T       | 3.795  | Indirect gap | 0.35108 | YVO <sub>3</sub> -T         | 2.49875 | Indirect gap | 0.54444 |
| ZnSnO <sub>3</sub> -C       | 3.901  | Direct gap   | 0.42336 | ZnSnO <sub>3</sub> -T       | 4.101   | Direct gap   | 0.22804 |
| ZnSnO <sub>3</sub> -O       | 4.201  | Direct gap   | 0.22054 | YVO <sub>3</sub> -H         | 2.702   | Indirect gap | 0.4283  |
