# Supplementary figures and images for: Investigation of thermal control in phase-changing ABO3 perovskites via first-principles predictions: general mechanism of solar absorptivity
Source: Royal Society of Chemistry journal article supplement (doi:10.1039/d3cp01493b), 2023-01-01

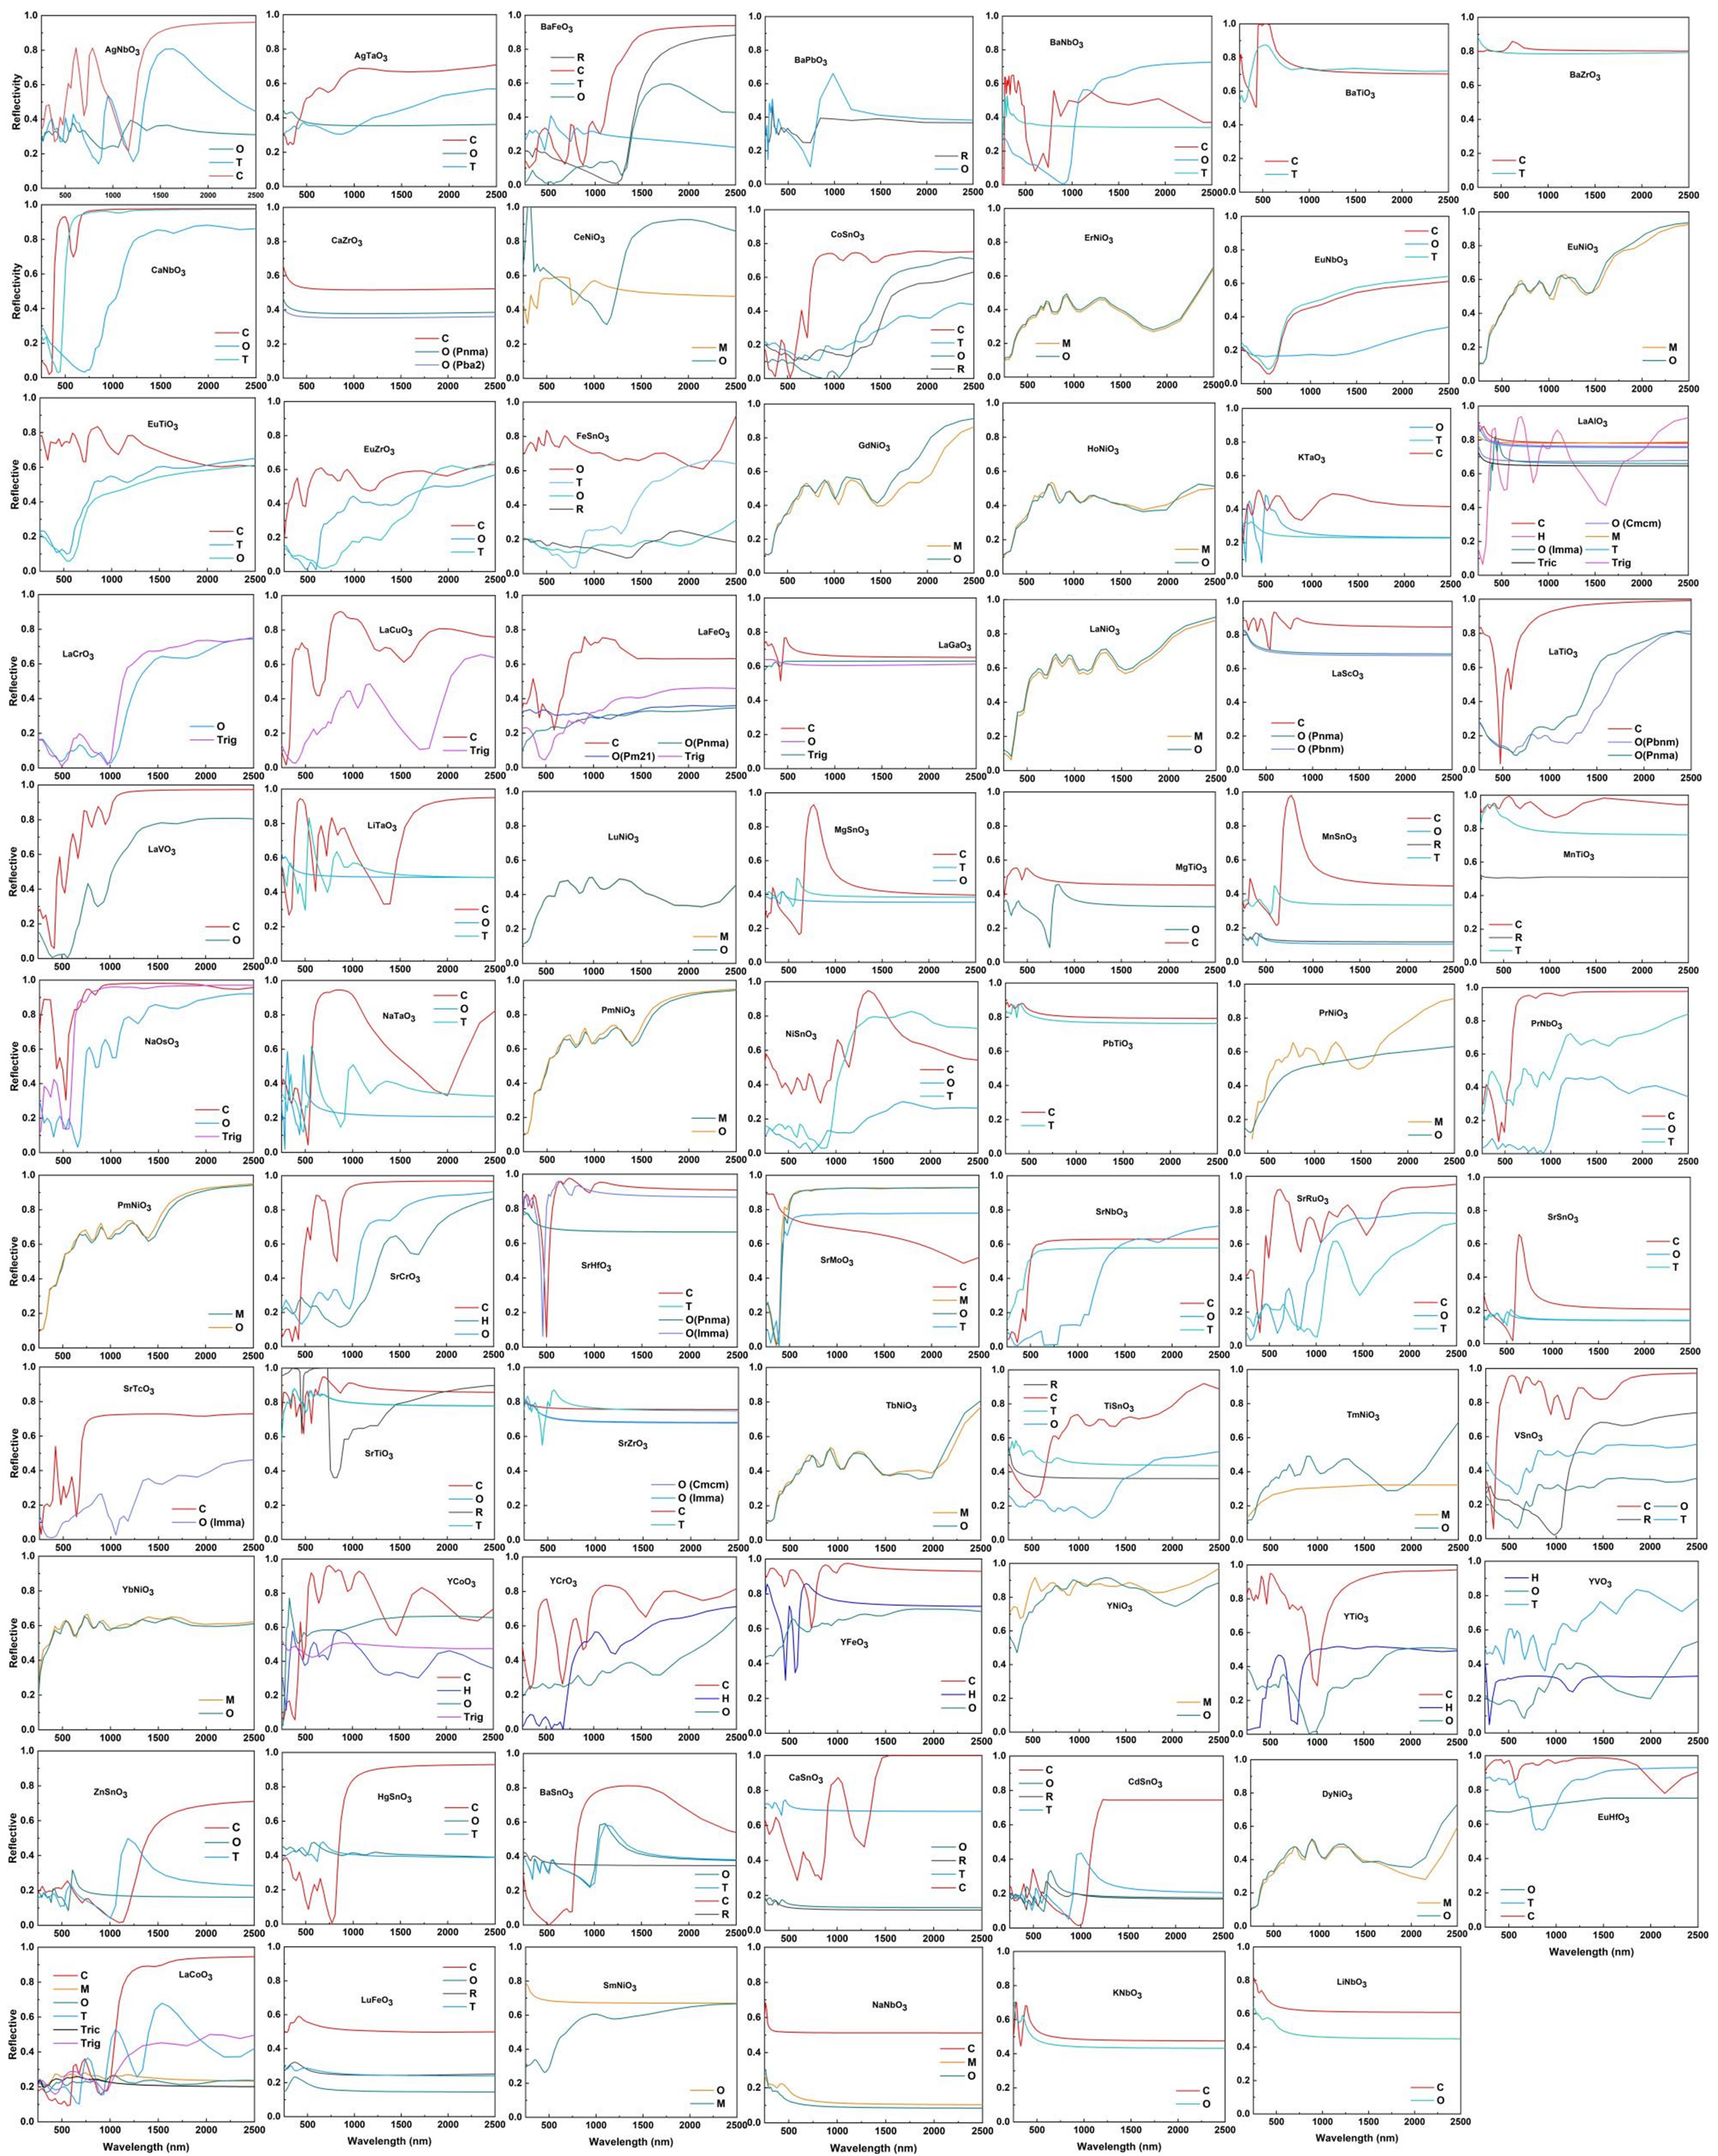

Supplement: d3cp01493b2.pdf [file d3cp01493b2.pdf]

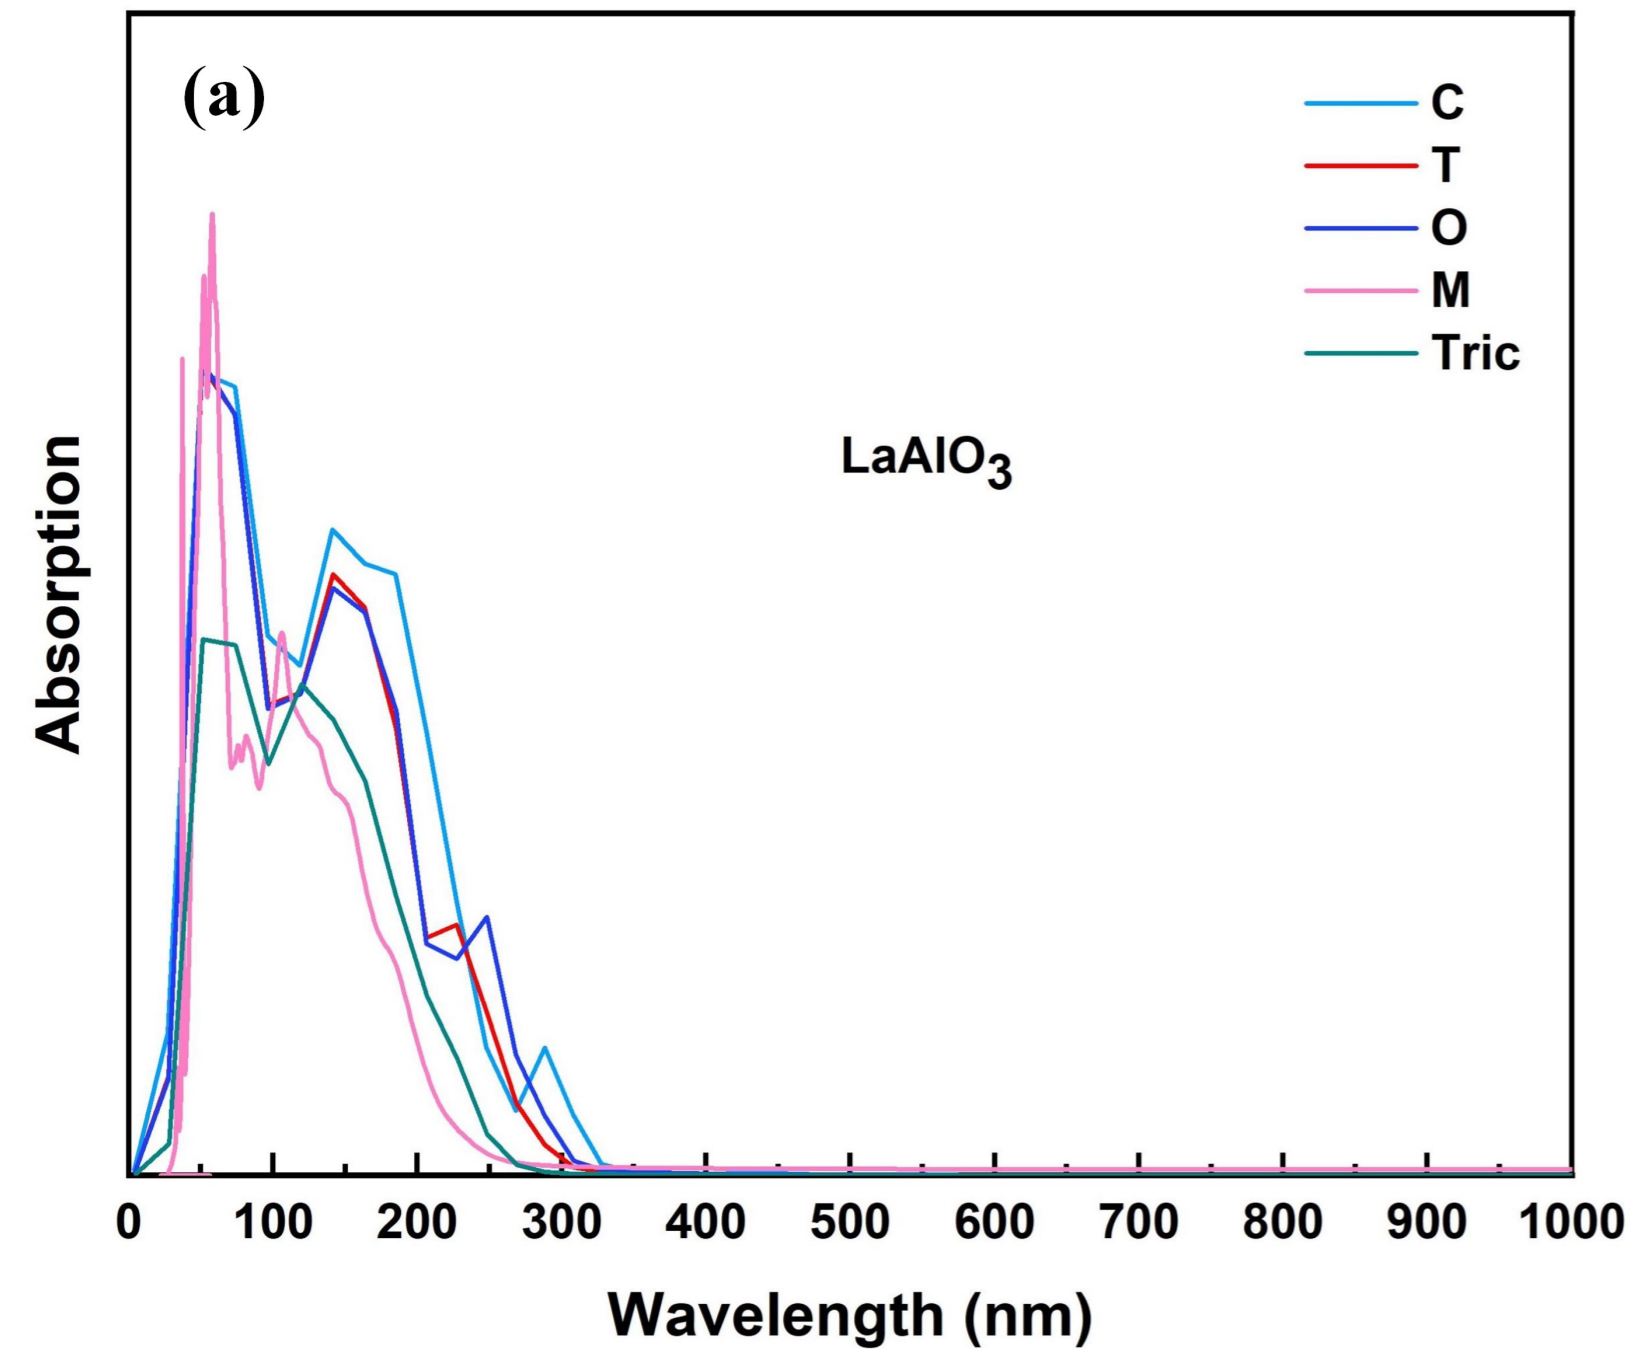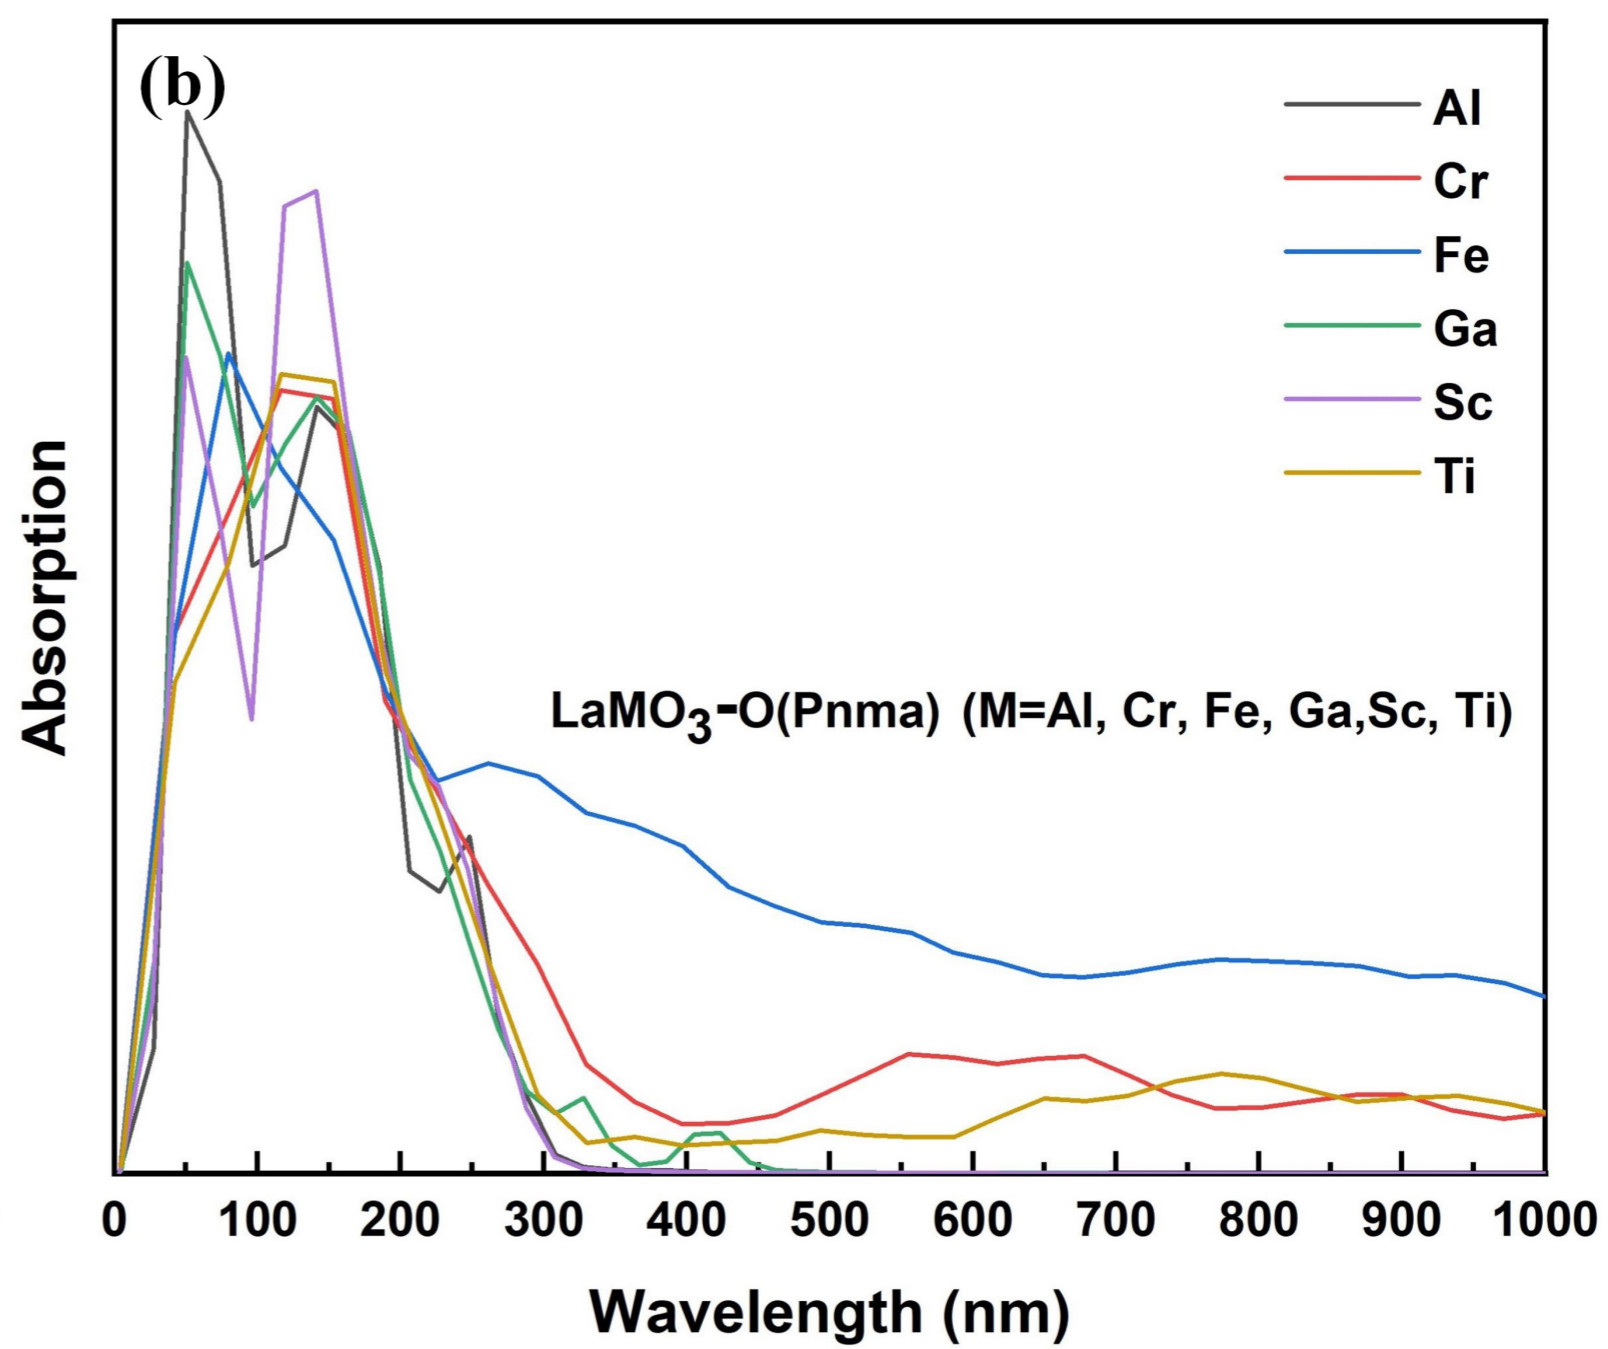

Supplement: d3cp01493b3.pdf [file d3cp01493b3.pdf]

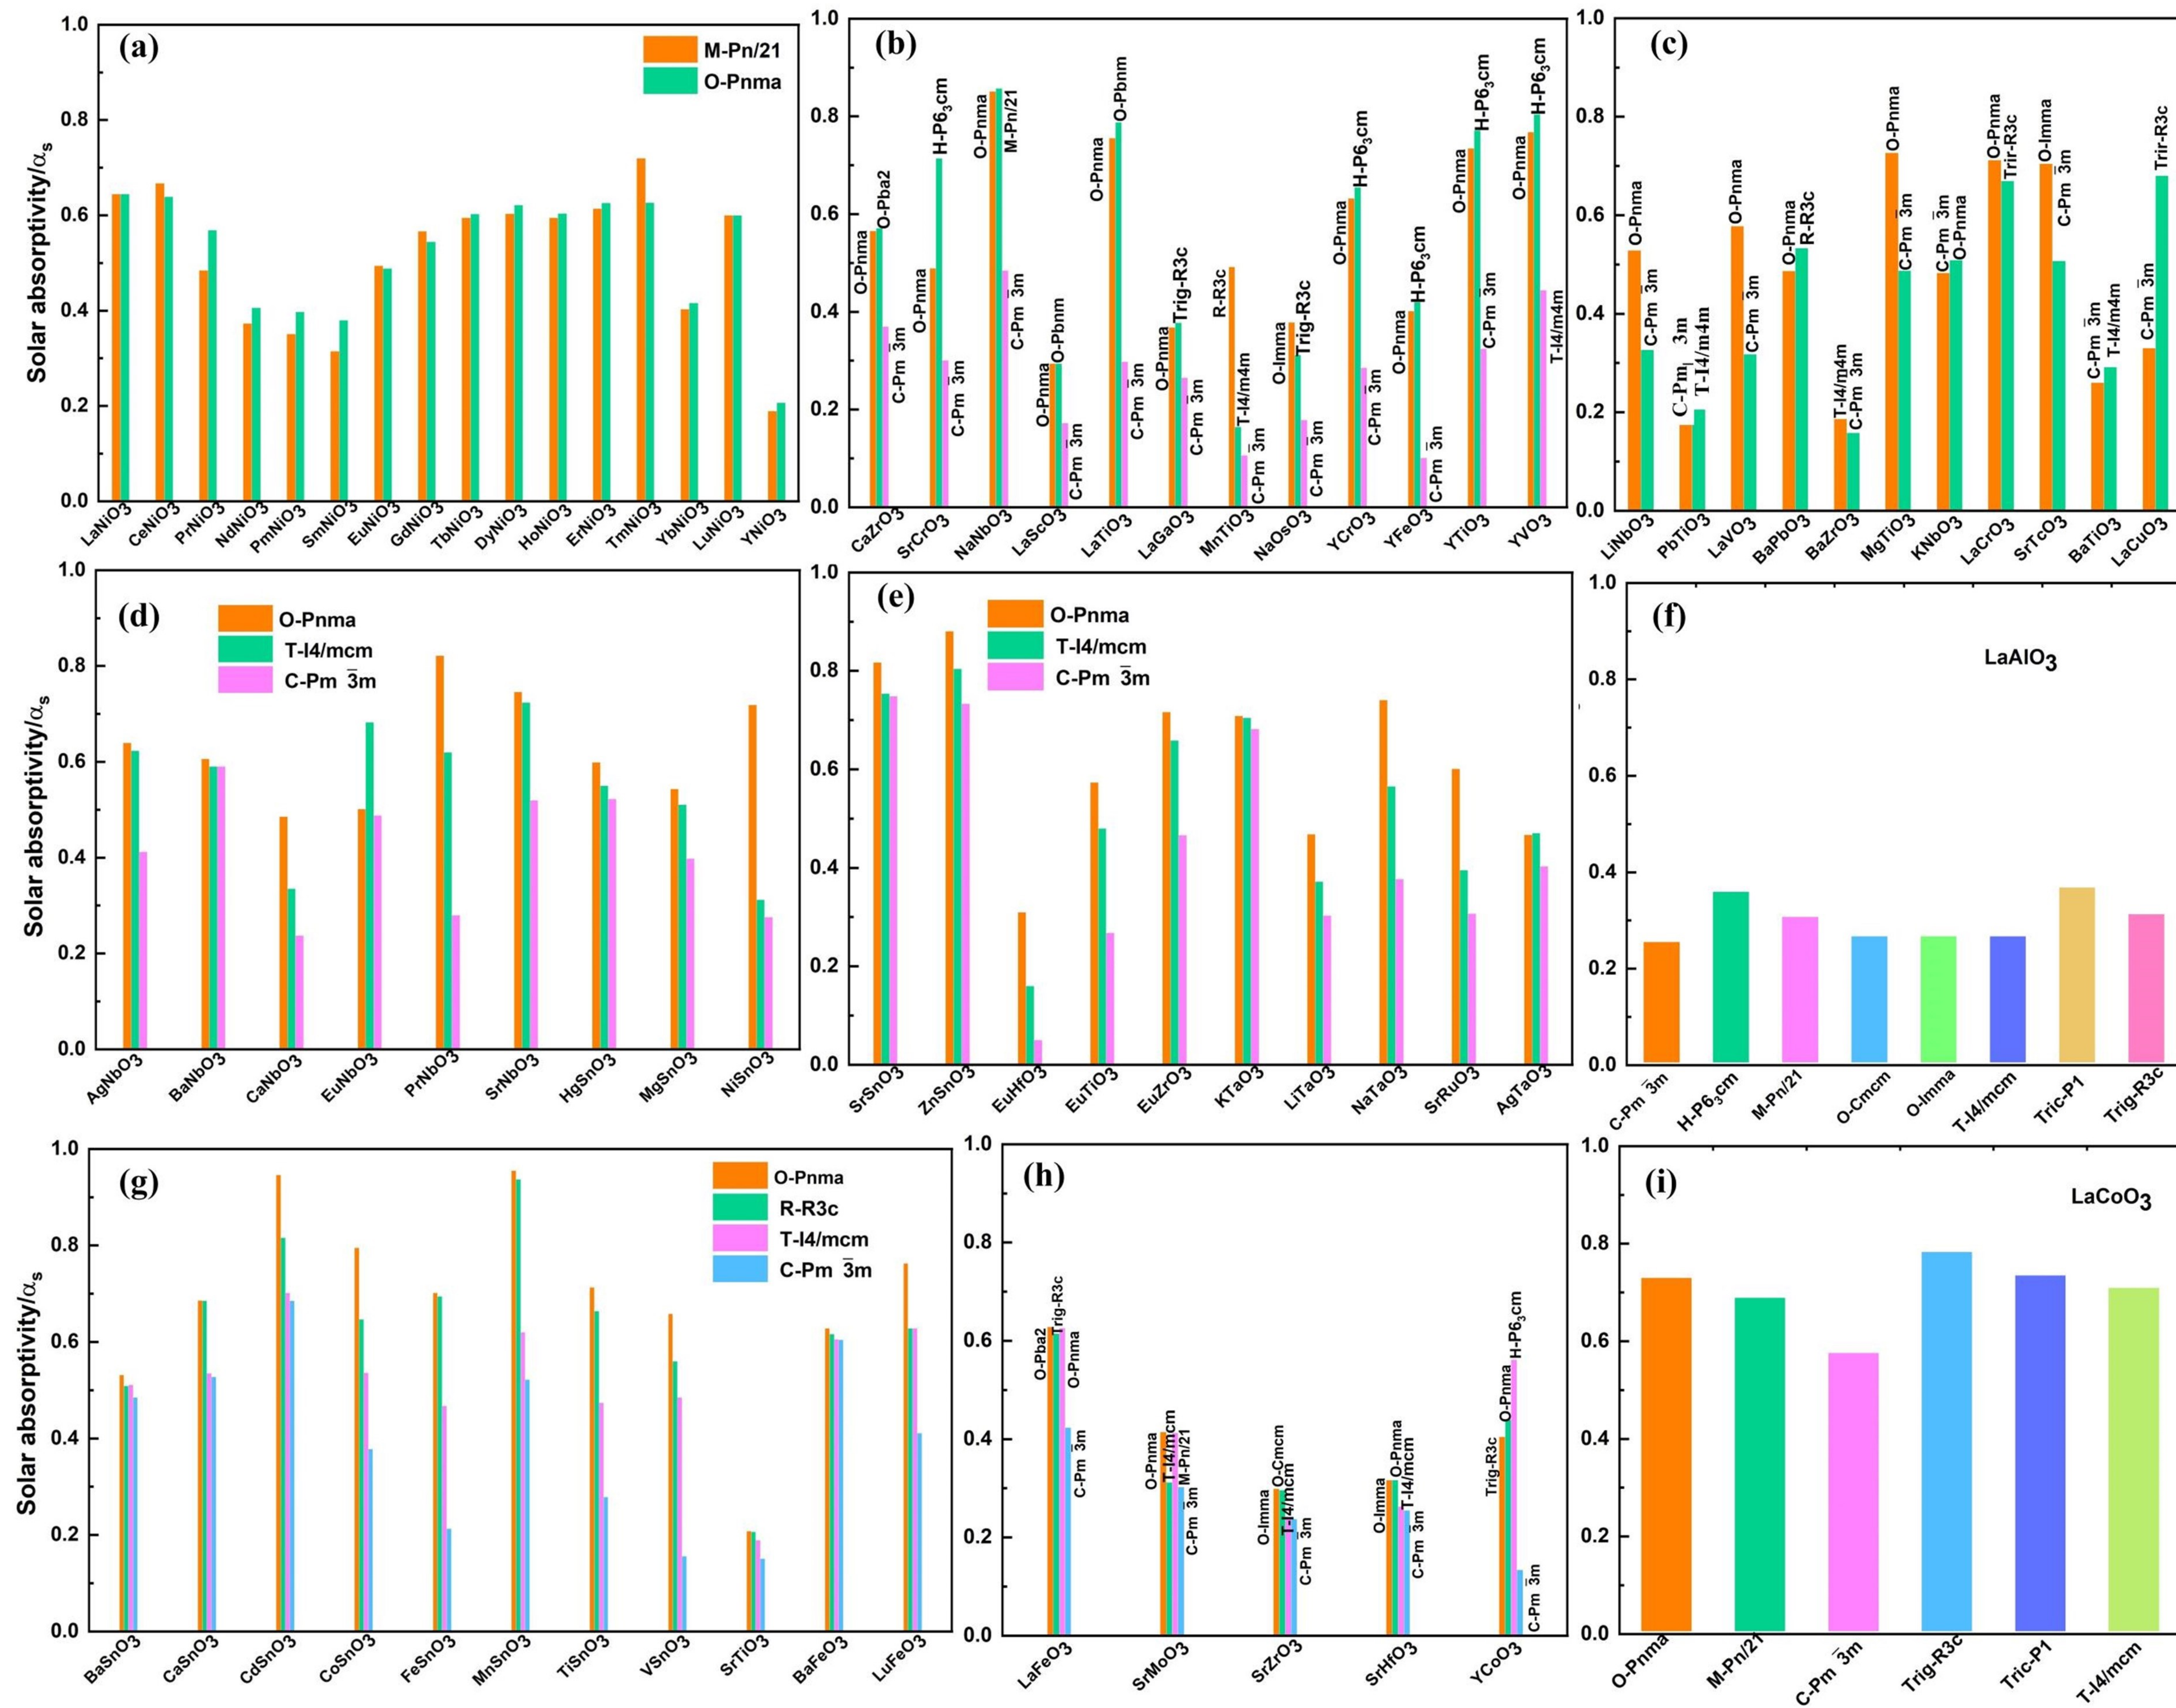

Supplement: d3cp01493b6.pdf [file d3cp01493b6.pdf]

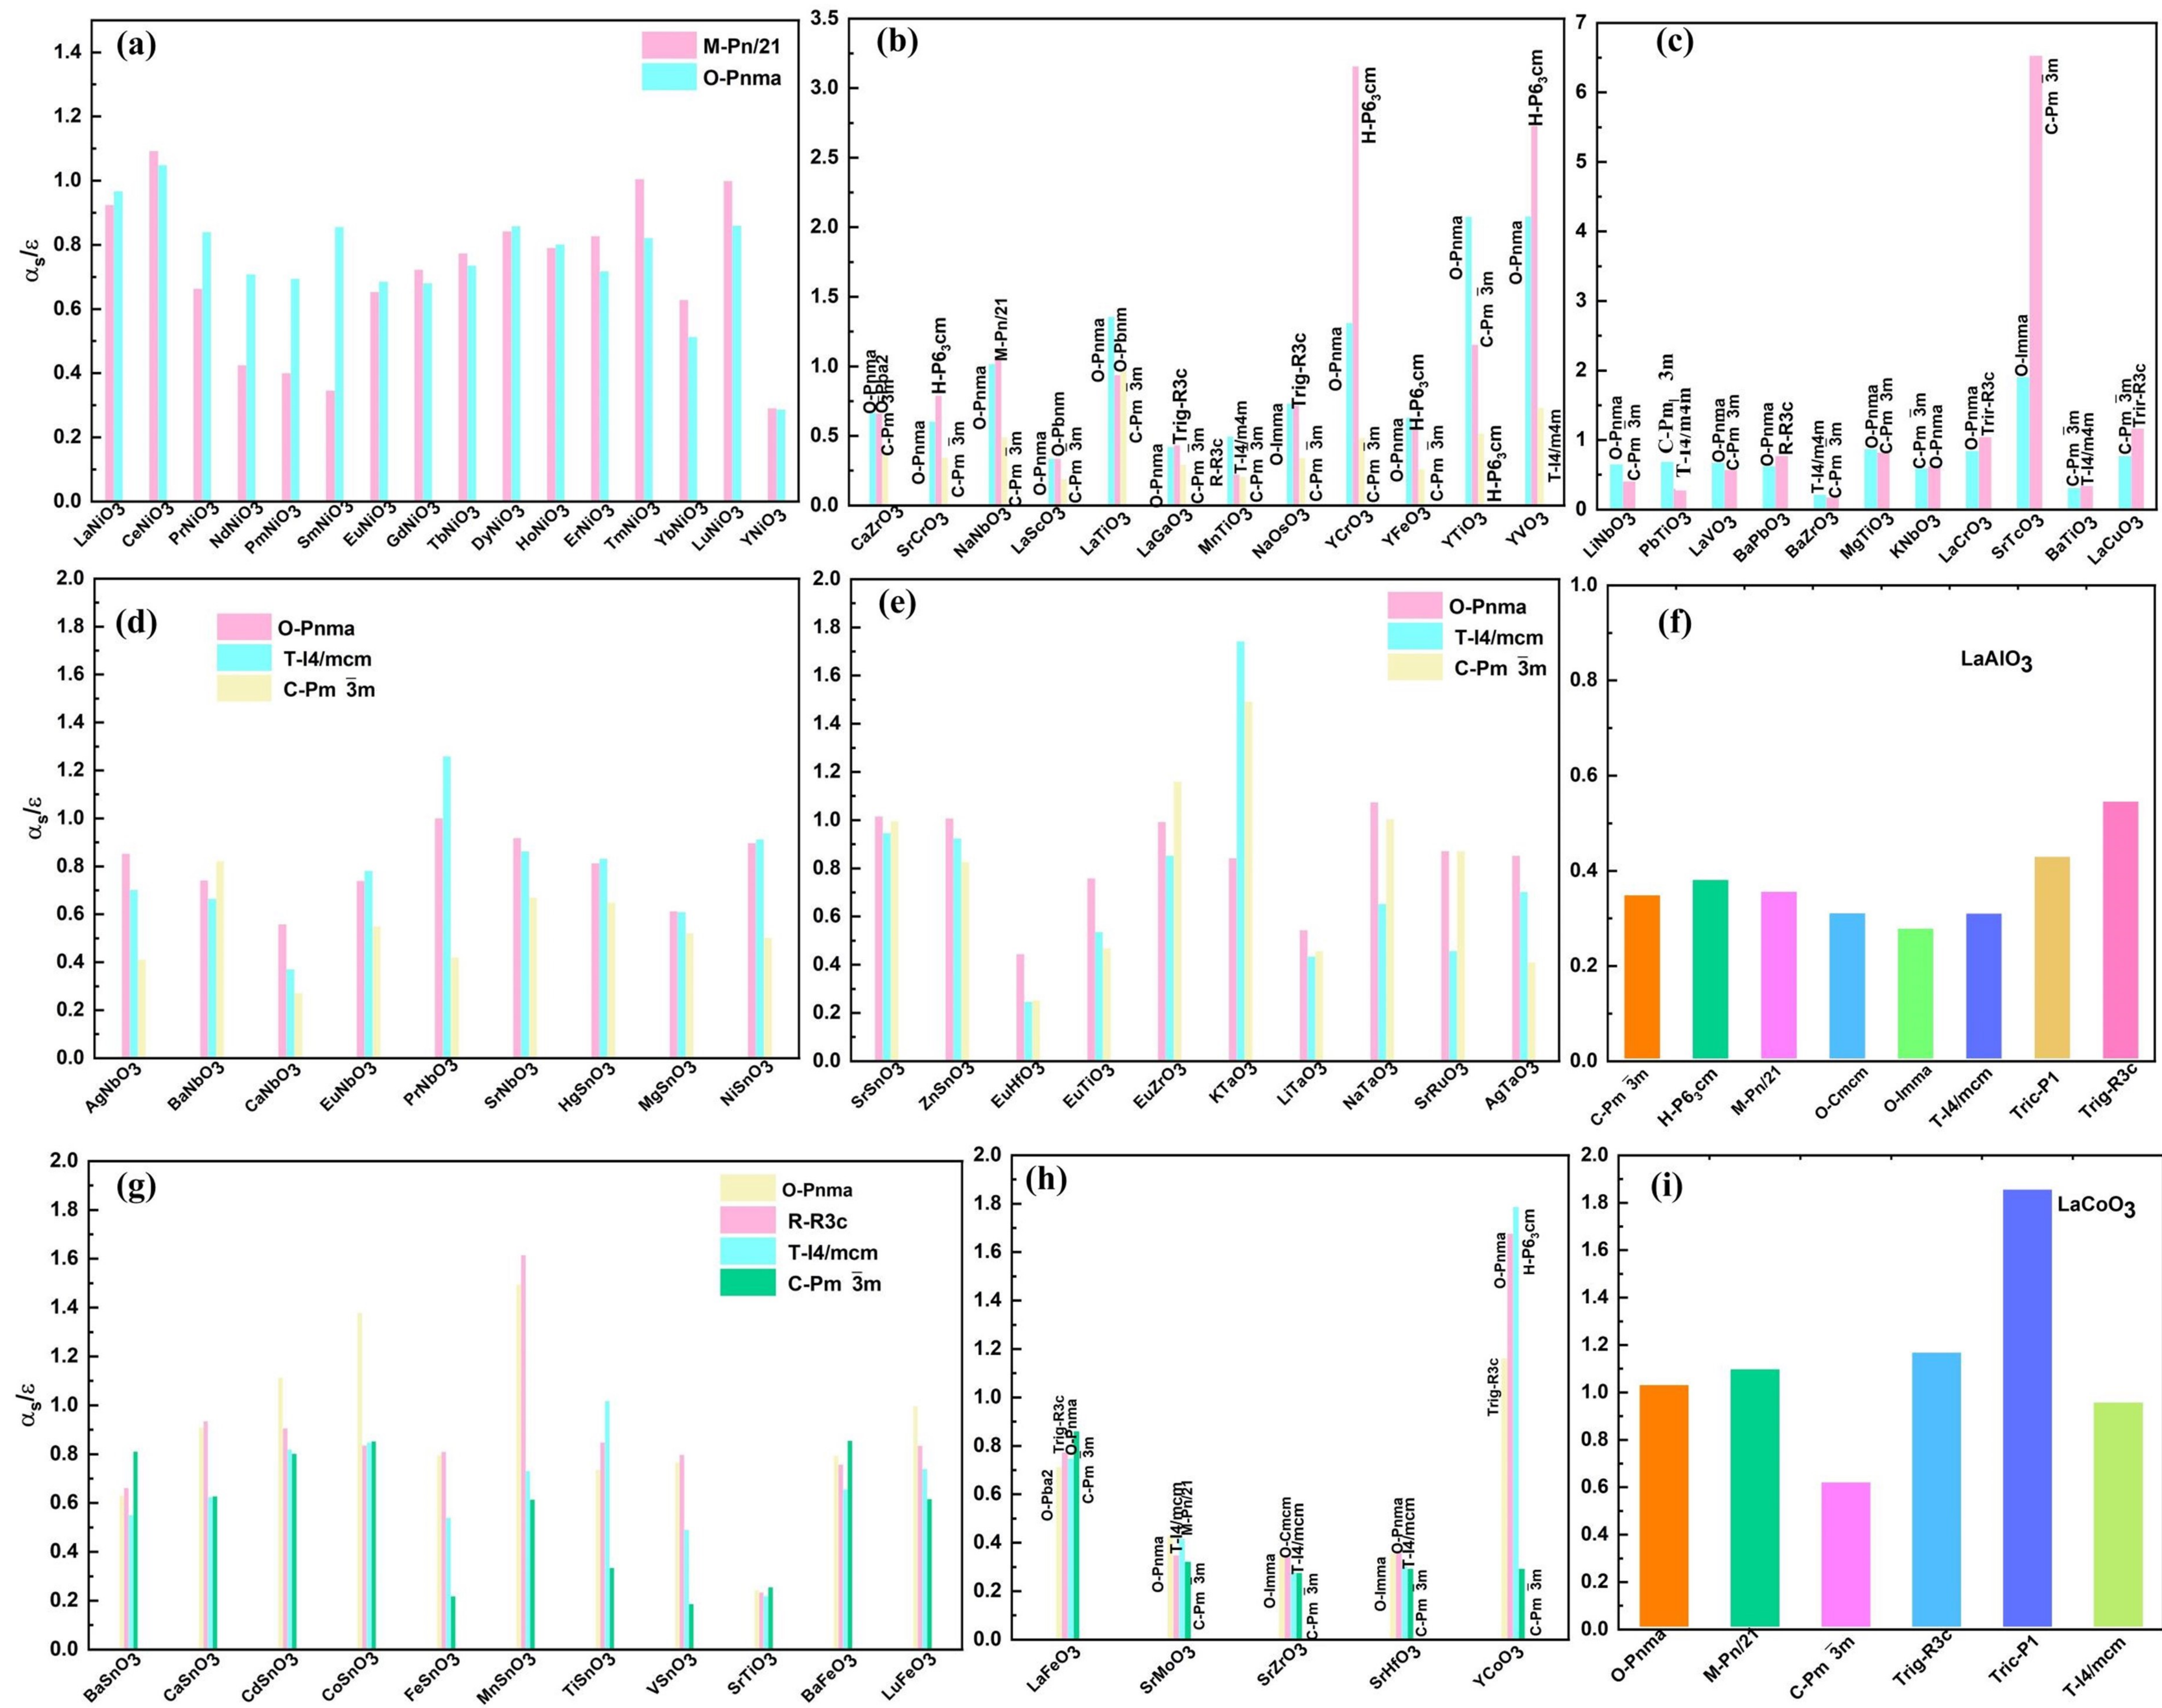

Supplement: d3cp01493b7.pdf [file d3cp01493b7.pdf]
